# Supplementary material for: Paediatric surgical outcomes in sub-Saharan Africa: a multicentre, international, prospective cohort study
Source: BMJ Glob Health. 2021 Sep 2;6(9):e004406. doi: 10.1136/bmjgh-2020-004406 (PMC8413881; doi:10.1136/bmjgh-2020-004406)
Supplement: Supplementary data [file bmjgh-2020-004406supp001.pdf]

## **Paediatric Surgical Outcomes in Sub-Saharan Africa: A Multicentre, International, Prospective Cohort Study**

PaedSurg Africa Research Collaboration

### **SUPPLEMENTAL APPENDIX**

**Appendix Methods 1. Patient Data Collection Form**  
**Appendix Methods 2. Hospital Survey**  
**Appendix Methods 3. Power calculation**  
**Appendix Figure 1. Additional hospitals providing survey data without patient data**  
**Appendix Table 1. High-income country benchmark data used as a comparator to observed SSA data**  
**Appendix Tables 2a-2e. Condition specific patient characteristics, management and outcomes**  
**Appendix Table 3. Mortality stratified by age**  
**Appendix Table 4. Patient follow-up**  
**Appendix Table 5. Univariable and multivariable analysis of patient-level and hospital-level factors associated with mortality for patients with gastroschisis, anorectal malformation and intussusception combined (generic patient variables only)**  
**Appendix Table 6. Univariable analysis of patient-level and hospital-level factors associated with mortality for patients with gastroschisis (generic and condition specific variables)**  
**Appendix Table 7. Univariable analysis of patient-level and hospital-level factors associated with mortality for patients with ARM (generic and condition specific variables)**  
**Appendix Table 8. Univariable analysis of patient-level and hospital-level factors associated with mortality for patient with intussusception (generic and condition specific variables)**  
**Appendix Table 9. Summary of the agreement between the main study and validation datasets**  
**Appendix Table 10. Validation survey undertaken by local investigators at validating centers**  
**Appendix Table 11. Validation of the hospital data**

## Appendix Methods 1. Patient Data Collection Form

### Generic variables for all conditions

REDCap Record ID:

#### Demographics

- Gestational age at birth:

The number of weeks from the first day of the woman's last menstrual cycle until birth.

- Sex: Male/ Female

- Weight:

In kilograms (kg) on the day of presentation. Answer to one decimal place.

- Time from onset of the condition to this presentation at your hospital (in days):

For example: Number of days from birth until presentation for gastroschisis and anorectal malformation. Time from onset of symptoms to presentation for appendicitis and intussusception. Time from first noticing the hernia to the first day of this admission at your hospital for patients with an inguinal hernia. Please include the first day and day of presentation in your calculation, for example, a patient presenting with appendicitis on 5<sup>th</sup> October 2016 who has had abdominal pain since 1st October 2016, please insert 5 days.

- Distance from the patient's home to your hospital:

In kilometres (km). Please round to the nearest kilometer.

- Mode of transport to your hospital:

Ambulance/ Other transport method provided by the health service/ Patient's own transport/ Born within your hospital

---

#### Peri-operative Factors

- American Society of Anesthesiologists (ASA) score at the time of primary surgery or intervention:  
1. healthy person/ 2. mild systemic disease/ 3. severe systemic disease/ 4. severe systemic disease that is a constant threat to life/ 5. a moribund patient who is not expected to survive without the operation/ Not applicable - intervention or surgery not undertaken

- Was a Surgical Safety Checklist used at the time of primary surgery or intervention?

Yes/ No/ Surgery or intervention not undertaken

- What type of anaesthesia was used for the primary intervention?

General anaesthesia with endotracheal tube/ General anaesthesia with laryngeal airway/ Ketamine anaesthesia/ Spinal or caudal anaesthesia/ Local anaesthesia/ No anaesthesia, just analgesia/ No anaesthesia, no analgesia/ Not applicable: no surgery or intervention undertaken.

For gastroschisis please enter the anaesthesia used at the time of defect closure. For intussusception please enter the anaesthesia used for the primary intervention whether it was an air- or hydro-enema or primary surgery.

- Who undertook the anaesthetic for the primary intervention?

Anaesthetic doctor/ Anaesthetic nurse/ Medical officer/ Other/ No anaesthetic undertaken

If other, please specify:

- Did the patient receive a blood transfusion during their primary admission?

No: not required/ No: it was required but not available/ Yes: not cross-matched/ Yes: cross-matched.

Indications for blood transfusion: a haemoglobin level less than 80g/L associated with symptoms including tachypnoea, shortness of breath and tachycardia.

---

#### Outcomes

- Did the patient survive to discharge? Yes/ No

If the patient was still in your hospital and alive at 30 days after primary admission, please select yes.

- If you were able to follow-up the patient, were they alive at 30 days following primary surgery/ intervention? Yes/ No/ Not followed up after discharge/ Not followed up to 30 days post-intervention

Follow-up includes either in person, via telephone or other means of reliable communication.

- Duration of hospital stay (days):

Please include the day of admission and the day of discharge in your calculation. For example, if a patient presented with appendicitis on 1st October and was discharged on the 5th October, their duration of hospital stay would be 5 days. If the patient died, please record the number of days from admission to death. Only include the duration of the primary admission; not subsequent admissions if the patient re-presented. If the operation was undertaken as a daycase and the patient was discharged the same day, please enter 1.

- Did the patient have a surgical site infection? Yes/ No

Surgical site infection criteria include at least one of the following: 1) purulent drainage from the superficial or deep (fascia or muscle) incision but not from within the organ/space component of the surgical site, 2) at least one of: pain or tenderness; localised swelling; redness; heat; fever; AND the incision is opened deliberately or spontaneously dehisces, 3) there is an abscess within the wound (clinically or radiologically detected).

- Did the patient have a full thickness wound dehiscence? Yes/ No

This is defined as all wound layers opening.

- Did the patient require a further intervention within 30 days of primary surgery?

No/ Yes - percutaneous intervention/ Yes - surgical intervention

- If the patient had a complication, when was it diagnosed?

During the primary admission/ As an emergency re-attender/ At routine follow-up as an out-patient/ Not applicable, no complications

- Did the patient require re-admission to hospital? Yes/ No

- If re-admission was required, what was the duration of their subsequent hospital stay (in days)?

Please include the day of admission and the day of discharge in your calculation. For example, if a patient re-presented on 1st November and was discharged on the 5th November, their duration of hospital stay would be 5 days. If the patient died, please record the number of days from admission to death.

- Was the patient followed up at 30 days post primary surgery or intervention to assess for complications?

No: data is based on in-patient observations only/ No: follow-up was done, but prior to 30 days/ Yes: reviewed in person/ Yes: via telephone consultation/ Yes: via other means/ Yes: still an in-patient at 30 days

- What study condition does this patient have?

Gastroschisis/ Anorectal malformation/ Appendicitis/ Intussusception/ Inguinal hernia

---

### Condition specific variables

#### Gastroschisis

- Type of gastroschisis:

Simple/ Complex: associated with atresia/ Complex: associated with necrosis/ Complex: associated with perforation

- Was the gastroschisis diagnosed antenatally? Yes/ No

- Was the neonate septic on arrival to your unit? Yes/ No

Sepsis is SIRS (Systemic Inflammatory Response Syndrome) with a suspected or confirmed bacterial, viral, or fungal cause. SIRS is a response to a stimulus, which results in two or more of the following: temperature  $> 38.5^{\circ}\text{C}$  or  $< 36^{\circ}\text{C}$ , tachycardia ( $>$  two standard deviations above normal), or bradycardia in children  $< 1$  year old ( $<$  10th centile for age), tachypnoea ( $>$  two standard deviations above normal), leukocyte count  $> 12,000$  cells/mm<sup>3</sup>,  $< 4,000$  cells/mm<sup>3</sup>, hyperglycemia, altered mental status, hyperlactemia, increased capillary refill time  $> 2$  seconds.

- Did the neonate receive broad spectrum antibiotics within an hour of arrival to your unit?

Yes/ No: not given within 1 hour, but they were given on the first day of admission/ No: not given on the first day of admission/ Broad spectrum antibiotics cover gram negative, gram positive and anaerobic bacteria.

- Were broad spectrum antibiotics continued for at least 48 hours after abdominal wall closure? Yes/ No

Or until death if the neonate did not survive until abdominal wall closure.

- If the neonate was hypothermic on arrival to your unit, were they warmed with an incubator or radiant heater?

Yes/ No/ Not applicable - not hypothermic

Hypothermia is defined as  $< 36.5^{\circ}\text{C}$  core temperature.

- Was the neonate hypovolaemic on arrival to your unit? Yes/ No

Hypovolaemia criteria include: prolonged capillary refill time  $> 2$  seconds, and/ or tachycardia ( $>$  two standard deviations above normal for age), mottled skin, reduced urine output ( $< 1\text{ml/kg/hr}$ ), cyanosis, impaired consciousness, hypotension (mean arterial pressure  $<$  5th percentile for age).

- Did the neonate receive an intravenous fluid bolus within an hour of arrival on your unit?

Yes/ No: not within 1 hour, but it was given on the first day of admission/ No: not given on the first day of admission. Please select 'yes' only if 10ml/kg or more of intravenous fluid was administered.

- What intravenous access was achieved for the neonate within the first day of arrival on your unit?

None/ Peripheral cannula/ Umbilical vein catheter/ Central line (including all types other than via the umbilical vein). Please tick all that apply.

- Time from admission to primary intervention (in hours):

Please round to the nearest hour. If a preformed silo was used, please enter the time from admission to the first application of the performed silo.

- Method of gastroschisis closure:

Not attempted (palliative care)/ Primary closure at the bedside (Bianchi technique)/ Preformed silo application, reduction and closure at the bedside/ Preformed silo, reduction and closure in the operating room/ Surgical silo, reduction and closure in the operating room/ Primary closure in the operating room/ Other.

If other, please specify:

- On what day following admission was abdominal wall closure achieved?

Please include the first day of admission and the day of closure in the calculation. For example, for a neonate admitted with gastroschisis on 2nd October and had the gastroschisis reduced and closed on 4th October, please insert 3 days.

- If ventilatory support was required at any point during the care of this neonate, was it available?

Yes/ No/ Not applicable - not required

- Did this neonate receive parenteral nutrition?

Yes, until full enteral intake was established/ Yes, but for less time than was required/ No

- Did the neonate have any of these complications within 30 days following primary intervention?

Ischaemic bowel/ Central line sepsis/ Abdominal compartment syndrome (defined as respiratory insufficiency secondary to compromised tidal volumes, decreased urine output caused by falling renal perfusion or any other organ dysfunction caused by increased intra-abdominal pressure)

If the patient had signs of abdominal compartment syndrome, was the abdomen re-opened?

### Anorectal malformation

- Type of anorectal malformation:

Perineal or vestibular - able to pass stool spontaneously/ Higher malformation

- Does the neonate have an addition anomaly?

None/ Vertebral, Cardiac/ Oesophageal atresia/ Tracheoesophageal fistula/ Renal/ Limb/ Other

- Was the baby septic on arrival to your unit? Yes/ No

Sepsis is SIRS (Systemic Inflammatory Response Syndrome) with a suspected or confirmed bacterial, viral, or fungal cause. SIRS is a response to a stimulus, which results in two or more of the following: temperature > 38.5°C or < 36°C, tachycardia (> two standard deviations above normal), or bradycardia in children < 1 year old (< 10th centile for age), tachypnea (> two standard deviations above normal), leukocyte count > 12,000 cells/mm<sup>3</sup>, < 4,000 cells/mm<sup>3</sup>, hyperglycemia, altered mental status, hyperlactemia, increased capillary refill time >2 seconds.

- Were broad spectrum antibiotics given at the time of diagnosis?

Yes/ No: not within 1 hour, but they were given on the first day of admission/ No: not given

Broad spectrum antibiotics cover gram negative, gram positive and anaerobic bacteria.

- Were broad spectrum antibiotics continued until at least 48 hours following surgery? Yes/ No

- If the neonate required ventilatory support at any stage during their perioperative care, was it available?

Yes/ No/ Not applicable: not required

- Did the neonate have preoperative bowel perforation? Yes/ No

- On what day following admission did the neonate receive surgical intervention?

Please include the first day of admission as day 1. For example, for a neonate admitted on 2nd October with an anorectal malformation and receiving a stoma on 4th October, please insert 3 days. Enter 0 if no intervention was undertaken.

- What was the primary operation undertaken?

None, spontaneously stooling/ Dilatation of perineal or vestibular fistula/ Loop transverse colostomy/ Divided transverse colostomy/ Loop sigmoid colostomy/ Divided sigmoid colostomy/ Other stoma/ Anoplasty Posterior sagittal anorectoplasty (PSARP)/ Modified PSARP/ Abdomino-perineal anorectoplasty/ Other

If 'modified PSARP' or 'other', please provide details:

- If primary anorectal reconstruction was undertaken, was a Peña stimulator or equivalent device used to identify the position of the muscle complex intra-operatively?

- If primary anorectal reconstructive surgery was undertaken, did they have a covering stoma?

Yes/ No/ Not applicable

- Did the patient have any of the following complications within 30 days of surgery?

Electrolyte disturbance/ High output stoma (over 20mls/kg/day)/ Stoma prolapse/ Peri-stoma skin breakdown (or perianal if primary reconstructive surgery undertaken without a covering stoma)/ Sepsis/ Anal stenosis in those undergoing primary anorectal reconstruction without covering stoma

- What is the plan for future management?

No further operative management/ Anoplasty or pull-through planned at your hospital/ Anoplasty or pull-through planned at another hospital/ Stoma closure planned at your hospital/ Stoma closure planned at another hospital

Please tick all that apply.

### Intussusception

- Age at presentation (in months):

Please round to the nearest month. If born prematurely, please enter the number of months since birth.

- How was the intussusception diagnosed?

Clinically/ On ultrasound/ Other (please provide details). Tick all that apply

- Septic on arrival? Yes/ No

Sepsis is SIRS (Systemic Inflammatory Response Syndrome) with a suspected or confirmed bacterial, viral, or fungal cause. SIRS is a response to a stimulus, which results in two or more of the following: temperature > 38.5°C or < 36°C, tachycardia (> two standard deviations above normal), or bradycardia in children < 1 year old (< 10th centile for age), tachypnea (> two standard deviations above normal), leukocyte count > 12,000 cells/mm<sup>3</sup>, < 4,000 cells/mm<sup>3</sup>, hyperglycemia, altered mental status, hyperlactemia, increased capillary refill time >2 seconds.

- Appropriate antibiotics given within an hour of diagnosis?

Yes/ No, not within one hour, but they were given prior to intervention (or death)/ No, not given

Appropriate antibiotics include those that cover common anaerobic and aerobic gut organisms.

- If hypovolaemic or septic, were intravenous fluids administered prior to the primary intervention?

Hypovolaemia criteria include: prolonged capillary refill time >2 seconds, and/ or tachycardia (> two standard deviations above normal for age), mottled skin, reduced urine output (< 1ml/kg/hr), cyanosis, impaired consciousness, hypotension (mean arterial pressure < 5th

percentile for age). Please select 'yes' only if 10ml/kg or more of intravenous fluid was administered.

- Did the patient have a contraindication to air- or hydro-enema reduction?

Yes, peritonitis/ Yes, perforation/ Yes, non-responsive shock/ Yes, other/ No

- What primary management did the patient have?

None attempted (palliative care)/ Air-enema reduction without anaesthetic/ Air-enema reduction with anaesthetic/ Hydro-enema reduction without anaesthetic/ Hydro-enema reduction with anaesthetic/ Laparotomy/ Laparoscopy/ Other (please specify)

If laparoscopy was used, was it converted to open?

- If air or enema reduction was attempted primarily, was it successful?

Yes/ No/ Not applicable, not attempted.

- How many attempts did it take to reduce the intussusception?

One attempt is defined as a series of increasing pressures, commonly up to a maximum of 120mmHg. A second attempt is considered to be a separate episode starting at the lowest pressure again.

- If air- or hydro-enema reduction was attempted primarily, was there a complication?

No/ Yes, perforation/ Yes, cardiorespiratory compromise and deterioration/ Yes, other

- If surgical intervention was required, what procedure was undertaken?

Manual reduction only/ Bowel resection and primary anastomosis/ Bowel resection and stoma

- How many hours following admission was the intussusception successfully reduced?

Please round to the nearest hour. If air- or hydro-enema reduction were attempted, but were unsuccessful, then the child had the intussusception reduced at laparotomy, please include the number of hours from admission to reduction in the operating room.

- Recurrence of intussusception within 30 days of original reduction?

Yes, within 30-days of original reduction/ No (patient not followed-up past discharge)/ No (patient followed-up at 30-days post original reduction)

## Appendicitis

- Age at diagnosis (in years):

Please round to the nearest whole year.

- Septic on arrival? Yes/ No

Sepsis is SIRS (Systemic Inflammatory Response Syndrome) with a suspected or confirmed bacterial, viral, or fungal cause. SIRS is a response to a stimulus, which results in two or more of the following: temperature  $> 38.5^{\circ}\text{C}$  or  $< 36^{\circ}\text{C}$ , tachycardia ( $>$  two standard deviations above normal), or bradycardia in children  $< 1$  year old ( $<$  10th centile for age), tachypnea ( $>$  two standard deviations above normal), leukocyte count  $> 12,000$  cells/mm<sup>3</sup>,  $< 4,000$  cells/mm<sup>3</sup>, hyperglycemia, altered mental status, hyperlactemia, increased capillary refill time  $> 2$  seconds.

- Appropriate pre-operative antibiotics given at the time of diagnosis?

Yes/ No, not within 1 hour, but they were given pre-operatively or on the day of admission if managed conservatively/ No, not given pre-operatively or on the day of admission

Appropriate antibiotics include those that cover common anaerobic and aerobic gut organisms.

- If hypovolaemic or septic, was intravenous fluid resuscitation administered pre-operatively?

Yes/ No/ Not applicable - not hypovolemic or septic

Hypovolaemia criteria include: prolonged capillary refill time  $> 2$  seconds, and/ or tachycardia ( $>$  two standard deviations above normal for age), mottled skin, reduced urine output ( $<$  1ml/kg/hr), cyanosis, impaired consciousness, hypotension (mean arterial pressure  $<$  5th percentile for age). Please select 'yes' only if 10ml/kg or more of intravenous fluid was administered.

- How many hours following admission was the surgery undertaken?

Please round to the nearest hour.

- What time of day was the operation started (to the nearest hour)?

- Operation undertaken:

Open appendicectomy (Lanz or Gridiron)/ Open appendicectomy (Laparotomy, midline incision or other)/ Laparoscopic appendicectomy/ Open right hemicolectomy/ Laparoscopic right hemicolectomy/ Appendix mass palpated pre-operatively, surgery not undertaken/ Appendix mass palpated under anaesthesia, surgery not undertaken/ No appendix mass palpated, patient managed conservatively with antibiotics

Other (please specify)

Conversion to open procedure? Yes/ No

- Operation findings:

Simple appendicitis/ Perforated appendicitis

If the appendix was gangrenous, please tick perforated.

- Was the peritoneal cavity washed out prior to closure?

- If yes, what was used to wash it out?

- Duration of appropriate intra-venous post-operative antibiotics (in days):

If no intravenous antibiotics were given, please enter 0. If the patient was managed conservatively, please enter the total number of days of intravenous antibiotics given.

- Duration of appropriate oral antibiotics given post-operatively (in days):

Please round to the nearest day. If intravenous antibiotics were given primarily then changed to oral antibiotics, please just enter the number of days of oral antibiotics here. If the patient was managed conservatively, enter the total number of days of oral antibiotics given.

- Did the patient have a post-operative intra-abdominal collection?  
No/ Yes, drained percutaneously with no imaging/ Yes, drained percutaneously with ultrasound guidance/ Yes, drained percutaneously with CT guidance/ Yes, drained via laparoscopy/ Yes, drained via a second open operation/ Yes, requiring a prolonged antibiotic course but no further surgical intervention/ Not applicable, not surgical intervention undertaken
- If yes, how was the intra-abdominal collection diagnosed?  
Clinically/ On ultrasound/ On CT/ At operation/ Other
- If visualised on imaging or at operation, was the collection 5cm in diameter or greater?

---

### Inguinal hernia

- Age at the time of operation (in weeks):  
Please round to the nearest week. For preterm neonates please input the number of weeks they have been alive since birth.
  - Hernia type (at the time of operation):  
Easily reducible/ Reduced with difficulty/ Irreducible or obstructed or strangulated/ Fistulated
  - Unilateral or bilateral?
  - Operation type: Elective/ Emergency
  - If emergency, how many hours from admission to primary surgery?  
Please round to the nearest hour.
  - Operation technique:  
Open herniotomy/ Laparoscopic herniotomy/ Laparotomy/ Other  
If other, please provide details:
  - Was there a conversion from laparoscopic to open?
  - Was a bowel resection required at the time of surgery?  
No/ Yes, via the inguinal incision with primary anastomosis/ Yes, via laparotomy with primary anastomosis/ Yes, with stoma formation/ Yes, other operation performed (please specify)
  - Was the testis found to be gangrenous at the time of surgery? Yes/ No
  - Were broad spectrum prophylactic antibiotics given at the time of the operation? Yes/ No  
Broad spectrum antibiotics cover gram negative, gram positive and anaerobic bacteria.
  - Duration of broad spectrum antibiotics given following surgery (in days):  
If no antibiotics were given following surgery, please enter 0.
  - Was there a recurrence of the hernia within 30 days of primary surgery?  
Yes/ No: not followed up after discharge/ No: not at 30-day follow-up in person/ No: not at 30-day follow-up via telephone/ No: not at 30-day follow-up via another means
  - Was the patient kept in overnight for continuous apnoea and saturation monitoring?  
Yes/ No: discharged the same day/ No: kept overnight but not monitored
-

## Appendix Methods 2. Hospital Survey

Title:  
Surname/ Last Name:  
First name:  
Professional position:  
Specialty:  
Full name of institution:  
Address of institution:  
Country:

---

### Personnel:

Number of Consultant Paediatric Surgeons undertaking general paediatric surgery at your institution:  
Number of Consultant Paediatric Surgeons undertaking neonatal surgery at your institution:  
Number of Consultant General Surgeons (covering adults and children) undertaking general paediatric surgery at your institution:  
Number of Consultant General Surgeons (covering adults and children) undertaking neonatal surgery at your institution:  
Number of medical officers undertaking general paediatric surgery independently at your institution:  
Number of medical officers undertaking neonatal surgery independently at your institution:  
Population served by your institution (in millions, including children and adults):

---

### Infrastructure:

Please state whether the following facilities are available at your institution when required (Each field requires an answer: always, sometimes or never available):

Running water  
Electricity  
Electricity generator back-up  
Laboratory for biochemistry  
Laboratory for hematology  
Blood bank  
Functioning ultrasound (US) machine  
Fluoroscopy  
Paediatric ventilation outside the operating room (OR)  
Neonatal ventilation outside the OR  
Paediatric intensive care unit for surgical pediatric patients pre and post operatively if required  
Neonatal intensive care unit for surgical neonates pre and post operatively (including if a stoma is present)  
Parenteral nutrition  
Surgical Safety Checklist in the OR  
Sterile gloves and gown  
Autoclave for sterilising surgical equipment  
Peña stimulator or equivalent device to identify the muscle complex during anorectal reconstruction

---

### Procedures:

Please state whether the following procedures are available at your institution when clinically appropriate/ required (Each field requires an answer: always, sometimes or never available):

Bedside primary reduction and closure of gastroschisis (Bianchi technique)  
Preformed silo application, reduction and closure of gastroschisis  
Surgical silo application, reduction and closure of gastroschisis  
Primary closure of gastroschisis in the operating room  
Sigmoid colostomy for anorectal malformation  
Posterior Sagittal Anorectoplasty (PSARP) for anorectal malformation  
Open appendicectomy  
Laparoscopic appendicectomy  
Ultrasound guided drainage of intra-abdominal collection  
CT guided drainage of intra-abdominal collection  
Open inguinal herniotomy

Laparoscopic inguinal herniotomy  
Radiologist trained to diagnose intussusception on ultrasound  
Air-enema reduction of intussusception  
Hydro-enema reduction of intussusception  
Laparotomy for intussusception  
Paediatric central line insertion  
Neonatal central line insertion  
Umbilical vein catheterisation

---

**Anesthesia and resuscitation:**

Please state whether the following facilities are available at your institution when required (Each field requires an answer: always, sometimes or never available):

Bottled oxygen  
Piped oxygen  
Oxygen saturation monitor  
Apnea monitor  
Multi-parameter intra-operative monitoring  
Paediatric bag, valve and mask  
Anaesthetic machine for neonates  
Anaesthetic machine for children  
Ketamine anaesthesia for children  
Ketamine anaesthesia for neonates  
Spinal/ caudal anaesthesia for children  
Spinal/ caudal anaesthesia for neonates  
Anaesthetic doctor competent to perform paediatric anaesthesia  
Anaesthetic doctor competent to perform neonatal anaesthesia  
Anaesthetic nurse competent to perform paediatric anaesthesia  
Anaesthetic nurse competent to perform neonatal anaesthesia

Does your country have at least one children's hospital that can provide neonatal and paediatric surgery?

Any other comments:

### Appendix Methods 3. Power calculation

Estimated patient numbers per hospital during a one month study period were: 1-2 with gastroschisis<sup>1-3</sup>, 1-2 with anorectal malformation<sup>4-7</sup>, 1 with intussusception<sup>8</sup>, 11 with appendicitis<sup>9,10</sup> and 14 with an inguinal hernia<sup>11-17</sup> (29 patients per centre). Estimates were calculated using the mean number of patients presenting per month to hospitals in sub-Saharan Africa (SSA) who have published data on these conditions as referenced below.

Power calculations were undertaken to determine the mortality rate required in SSA for there to be a significant difference between SSA and published high-income country (HIC) benchmark data if 50 SSA hospitals participated in the study (1450 patients). The minimum differences that can be detected at a 5% significance level with 80% power are summarized in the table below.

#### The minimum detectable differences in mortality between SSA and HICs if 50 hospitals participated in the study

|                        | High income country |                 | Sub-Saharan Africa              |                                                        |
|------------------------|---------------------|-----------------|---------------------------------|--------------------------------------------------------|
|                        | Patient population* | Mortality rate* | Estimated study population size | Mortality rate in SSA at minimum detectable difference |
| <b>Gastroschisis</b>   | 301                 | 4%              | 75                              | 14.5%                                                  |
| <b>ARM</b>             | 410                 | 3%              | 75                              | 12.2%                                                  |
| <b>Intussusception</b> | 9186                | 0.2%            | 50                              | 5%                                                     |
| <b>Appendicitis</b>    | 24665               | 0.004%          | 550                             | 0.43%                                                  |
| <b>Inguinal hernia</b> | 10137               | 0%              | 700                             | 0.40%                                                  |

\* sources of benchmark data are detailed in Appendix Table 1.

All mortality rates at the minimum detectable difference are lower than previously reported in SSA suggesting at 50 hospitals there should be adequate power to detect significant differences between observed SSA data and benchmark HIC data.

### References

- Agugua NE, Nwako FA. Gastroschisis a fifteen-year experience. *West Afr J Med*, 1990;9(2):147-50.
- Arnold M. Is the incidence of gastroschisis rising in South Africa in accordance with international trends? A retrospective analysis at Pretoria Academic and Kalafong Hospitals, 1981-2001. *S Afr J Surg*, 2004;42(3):86-8.
- Wright NJ, Zani A, Ade-Ajayi N. Epidemiology, management and outcome of gastroschisis in Sub-Saharan Africa: Results of an international survey. *Afr J Paediatr Surg*, 2015;12(1):1-6.
- Govender S, Wiersma R. Delayed diagnosis of anorectal malformations (ARM): causes and consequences in a resource-constrained environment. *Pediatr Surg Int*, 2016;32(4):369-75.
- Kigo CN, Ndung'u JM. Bowel function following primary repair of anorectal malformations at Kenyatta National Hospital. *East Afr Med J*, 2002;79(3):124-7.
- Chirdan LB, Uba FA, Ameh EA, Mshelbwala PM. Colostomy for high anorectal malformation: an evaluation of morbidity and mortality in a developing country. *Pediatr Surg Int*, 2008;24(4):407-10.
- Lawal TA, Olulana DI, Ogundoyin OO. Spectrum of colorectal surgery operations performed in a single paediatric surgery unit in sub-Saharan Africa. *Afr J Paediatr Surg*, 2014;11(2):128-31.
- Jiang J, Jiang B, Parashar U, et al. Childhood intussusception: a literature review. *PLoS One*, 2013;8(7):e68482.
- Derbew M, Ahmed E. The pattern of pediatric surgical conditions in Tikur Anbessa University Hospital, Addis Ababa, Ethiopia. *Ethiop Med J*, 2006;44(4):331-8.
- Kong VY, Sartorius B, Clarke DL. Acute appendicitis in the developing world is a morbid disease. *Ann R Coll Surg Engl*, 2015;97(5):390-5.
- Bamigbola KT, Nasir AA, Abdur-Rahman LO, Adeniran JO. Complicated childhood inguinal hernias in UITH, Ilorin. *Afr J Paediatr Surg*, 2012;9(3):227-30.
- Eeson G, Birabwa-Male D, Pennington M, Blair GK. Costs and cost-effectiveness of pediatric inguinal hernia repair in Uganda. *World J Surg*, 2015;39(2):343-9.
- Zamakhshary M, To T, Guan J, Langer JC. Risk of incarceration of inguinal hernia among infants and young children awaiting elective surgery. *CMAJ*, 2008;179(10):1001-5.
- Ameh EA. Morbidity and mortality of inguinal hernia in the newborn. *Niger Postgrad Med J*, 2002;9(4):233-4.
- Usang UE, Sowande OA, Adejuyigbe O, Bakare TI, Ademuyiwa OA. The role of preoperative antibiotics in the prevention of wound infection after day case surgery for inguinal hernia in children in Ile Ife, Nigeria. *Pediatr Surg Int*, 2008;24(10):1181-5.
- Ameh EA. Incarcerated and strangulated inguinal hernias in children in Zaria, Nigeria. *East Afr Med J*, 1999;76(9):499-501.
- Ohene-Yeboah M, Abantanga F, Oppong J, et al. Some aspects of the epidemiology of external hernias in Kumasi, Ghana. *Hernia*, 2009;13(5):529-32.

**Appendix Figure 1. Additional hospitals providing survey data without patient data (n=23)**

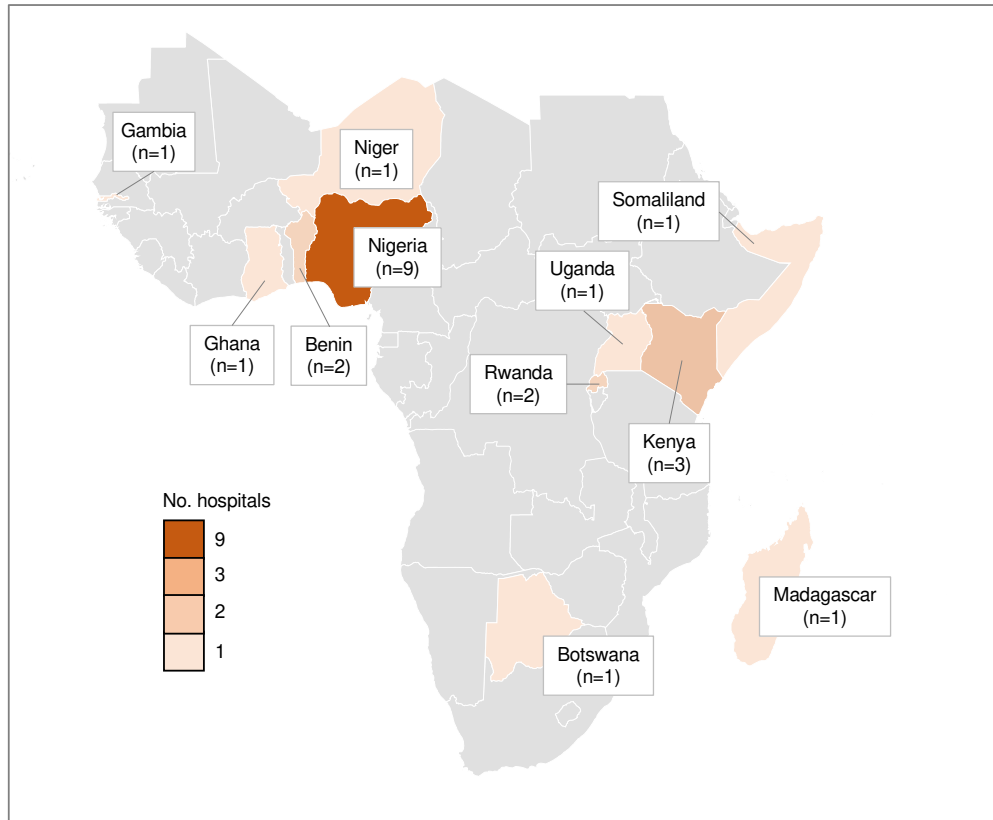

**Appendix Table 1. High-income country benchmark data used as a comparator to observed SSA data**

| Condition        | Study(s) used as comparator*      | Study region, type and population.                                                                                                                                           | Mortality rate, % (deaths/study population) | Timeframe of mortality rate and comparability to PaedSurg Africa study results                                                                                                                                                                                                                                                                                                                                                                                                                                                                                                                                                                                                                                                                       |
|------------------|-----------------------------------|------------------------------------------------------------------------------------------------------------------------------------------------------------------------------|---------------------------------------------|------------------------------------------------------------------------------------------------------------------------------------------------------------------------------------------------------------------------------------------------------------------------------------------------------------------------------------------------------------------------------------------------------------------------------------------------------------------------------------------------------------------------------------------------------------------------------------------------------------------------------------------------------------------------------------------------------------------------------------------------------|
| Gastroschisis    | Bradnock et al, 2011 <sup>1</sup> | UK. National cohort study, whole population.                                                                                                                                 | 2.0% (6/302)                                | Neonatal period and within 30-days of primary intervention (equivalent to the PaedSurg Africa study).<br>Of note, the study reports an overall mortality of 4.0% (12/302) at 1-year, but 6/302 deaths were after 30-days from primary intervention and hence were not included within the benchmark HIC mortality used as a comparator.                                                                                                                                                                                                                                                                                                                                                                                                              |
| ARM              | Rintala et al, 2008 <sup>2</sup>  | Finland. Single author's case series (270 high ARM, 140 low ARM)                                                                                                             | 2.9% (12/410)                               | The author describes the mortality timeframe within 'short-term outcomes' prior to 'early childhood'. Hence, the timeframe could be longer than in the PaedSurg Africa study. Also, the data is from 1984-1998 and hence outcomes could have improved further since. Overall, this mortality rate could be an overestimation of the current mortality from ARM in HICs, but it is unlikely to be an underestimation. Also, the Rintala series has a higher proportion of patients with high ARM (65.9%) than this study (50.5%) and high ARM is associated with higher mortality. Hence, again this difference in the cohorts could result in an underestimation of the disparity in mortality between SSA and HICs, but unlikely an overestimation. |
| Intussusception  | Jiang et al, 2013 <sup>3</sup>    | Australia, Europe, New Zealand, USA. Literature review of studies published globally since 2002. Data from 34 studies: 11 national, 9 regional, 14 hospital.                 | 0.2% (18/9186)                              | Mortality was defined as 'Case-fatality among children hospitalised with intussusception'. Hence, this is equivalent to the all-cause, in-hospital mortality utilised in this study and indeed the 30-day post-intervention mortality since no deaths were reported following discharge.                                                                                                                                                                                                                                                                                                                                                                                                                                                             |
| Appendicitis     | Healy et al, 2015 <sup>4</sup>    | Canada, UK, USA. Systematic review and meta-analysis. Data for mortality were pooled from 3 hospital based studies containing both paediatric and general surgeon operators. | 0.004% (1/24665)                            | One death occurred during the primary hospital admission. This is comparable with the data from this study which also had one death during the primary admission.                                                                                                                                                                                                                                                                                                                                                                                                                                                                                                                                                                                    |
| Inguinal hernia† | Ein et al, 2006 <sup>5</sup>      | Canada. Single operator case series (n=6361) from 1969 to 2004.                                                                                                              | 0% (0/6361)                                 | 1-12 month follow-up (mean 6-months). Hence, the mortality at discharge and 30-day post primary intervention follow-up was 0% to use as a comparator.                                                                                                                                                                                                                                                                                                                                                                                                                                                                                                                                                                                                |

\* These represent the published HIC studies with the largest sample sizes and most representative populations at the time of study design. †The Erdogan et al study detailed as a comparator in the PaedSurg Africa study protocol was not used as it was based in Turkey, which is upper middle income rather than high-income. ARM: Anorectal malformation. HIC: High-income country. SSA: Sub-Saharan Africa. UK: United Kingdom. USA: United States of America.

## References

1. Bradnock TJ, Marven S, Owen A, et al; BAPS-CASS. Gastroschisis: one year outcomes from national cohort study. *BMJ*. 2011;343:d6749.
2. Rintala R, Pakarinen M. Imperforate anus: long- and short-term outcome. *Sem Pediatr Surg*, 2008;17:79-89.
3. Jiang J, Jiang B, Parashar U, et al. Childhood intussusception: a literature review. *PLoS One*, 2013;8(7):e68482.
4. Healy DA, Doyle D, Moynagh E, et al. Systematic review and meta-analysis on the influence of surgeon specialization on outcomes following appendicectomy in children. *Medicine (Baltimore)*, 2015;94(32):e1352.
5. Ein SH, Njere I, Ein A. Six thousand three hundred sixty-one pediatric inguinal hernias: a 35-year review. *J Pediatr Surg*, 2006;41(5):980-6.

**Appendix Table 2a. Condition specific patient characteristics, management and outcomes for patients with gastroschisis, n=111** (Data from 36 hospitals)

| Variable                                                                                         | Number of cases, n (%)  |
|--------------------------------------------------------------------------------------------------|-------------------------|
| <b>Type of gastroschisis:</b>                                                                    |                         |
| Simple                                                                                           | 80 (72.1)               |
| Complex with atresia                                                                             | 5 (4.5)                 |
| Complex with necrosis                                                                            | 22 (19.8)               |
| Complex with perforation                                                                         | 3 (2.7)                 |
| Complex with atresia and perforation                                                             | 1 (0.9)                 |
| <b>Was it diagnosed antenatally?</b>                                                             |                         |
| No                                                                                               | 106 (95.5)              |
| Yes                                                                                              | 5 (4.5)                 |
| <b>Septic on arrival:</b>                                                                        |                         |
| No                                                                                               | 50 (45.5)               |
| Yes                                                                                              | 60 (54.5)               |
| Missing*                                                                                         | 1                       |
| <b>Broad spectrum antibiotics given within an hour of presentation?</b>                          |                         |
| Yes                                                                                              | 56 (50.5)               |
| Not within 1hr, but on the first day of admission                                                | 53 (47.7)               |
| Not on the first day of admission                                                                | 2 (1.8)                 |
| <b>Were broad spectrum antibiotics continued for 48-hours after abdominal wall closure?</b>      |                         |
| No                                                                                               | 22 (23.9)               |
| Yes                                                                                              | 70 (76.1)               |
| NA - palliative care*                                                                            | 19                      |
| <b>If the neonate was hypothermic, were they warmed?</b>                                         |                         |
| No                                                                                               | 19 (22.6)               |
| Yes                                                                                              | 65 (77.4)               |
| NA - not hypothermic*                                                                            | 27                      |
| <b>Was the neonate hypovolaemic at presentation?</b>                                             |                         |
| No                                                                                               | 47 (42.3)               |
| Yes                                                                                              | 64 (57.7)               |
| <b>Did the neonate receive an intravenous fluid bolus within an hour of presentation?</b>        |                         |
| Yes                                                                                              | 58 (52.7)               |
| Not within 1hr, but on the first day of admission                                                | 41 (37.3)               |
| Not on the first day of admission                                                                | 11 (10.0)               |
| Missing*                                                                                         | 1                       |
| <b>Peripheral cannula on the first day:</b>                                                      |                         |
| No                                                                                               | 7 (6.3)                 |
| Yes                                                                                              | 104 (93.7)              |
| <b>Umbilical vein catheter (UVC) on the first day:</b>                                           |                         |
| No                                                                                               | 104 (93.7)              |
| Yes                                                                                              | 7 (6.3)                 |
| <b>Central line (excluding UVC) on the first day:</b>                                            |                         |
| No                                                                                               | 106 (95.5)              |
| Yes                                                                                              | 5 (4.5)                 |
| <b>Time from admission to primary intervention (hours). Median, IQR (range)†</b>                 | <b>7, 3-18, (0-168)</b> |
| <b>Method of gastroschisis closure:</b>                                                          |                         |
| Not attempted - palliative care                                                                  | 20 (18.2)               |
| Primary closure at the cotside (Bianchi technique)                                               | 5 (4.5)                 |
| Preformed silo, reduction and closure at cotside                                                 | 33 (30.0)               |
| Preformed silo, reduction and closure in the operating room                                      | 13 (11.8)               |
| Surgical silo, reduction and closure in the operating room                                       | 8 (7.3)                 |
| Primary closure in the operating room                                                            | 16 (14.5)               |
| Improvised silo with plastic or female condom                                                    | 15 (13.6)               |
| Missing*                                                                                         | 1                       |
| <b>On what day following admission was abdominal wall closure achieved? Median, IQR (range)†</b> | <b>1, 0-3, (0-48)</b>   |

| Variable                                                                       | Number of cases, n (%) |
|--------------------------------------------------------------------------------|------------------------|
| <b>If the neonate required ventilatory support, was it available?</b>          |                        |
| No                                                                             | 36 (50.7)              |
| Yes                                                                            | 35 (49.3)              |
| NA - not required*                                                             | 40                     |
| <b>Did the neonate receive parenteral nutrition?</b>                           |                        |
| No                                                                             | 70 (63.1)              |
| Yes, but for less time than required                                           | 15 (13.5)              |
| Yes, until full enteral intake was established                                 | 26 (23.4)              |
| <b>Did the neonate develop bowel ischaemia following intervention?</b>         |                        |
| No                                                                             | 60 (70.6)              |
| Yes                                                                            | 25 (29.4)              |
| NA*                                                                            | 24                     |
| Missing*                                                                       | 2                      |
| <b>Did the neonate develop following intervention?</b>                         |                        |
| No                                                                             | 54 (85.7)              |
| Yes                                                                            | 9 (14.3)               |
| NA*                                                                            | 43                     |
| Missing*                                                                       | 5                      |
| <b>If abdominal compartment syndrome developed, was the abdomen re-opened?</b> |                        |
| No                                                                             | 6 (66.7)               |
| Yes                                                                            | 3 (33.3)               |
| <b>Did the neonate develop central line sepsis?</b>                            |                        |
| No                                                                             | 40 (90.9)              |
| Yes                                                                            | 4 (9.1)                |
| NA*                                                                            | 62                     |
| Missing*                                                                       | 5                      |

\* Excluded from percentage calculations. † One patient was missing data for each of these variables. IQR: Interquartile range.

NA: Not applicable. Percentages have been rounded and may not total 100.

**Appendix Table 2b. Condition specific patient characteristics, management and outcomes for patients with anorectal malformation, n=188** (Data from 42 hospitals)

| Variable                                                                        | Number of cases, n (%) |
|---------------------------------------------------------------------------------|------------------------|
| <b>Type of anorectal malformation:</b>                                          |                        |
| Low                                                                             | 92 (49.5)              |
| High                                                                            | 94 (50.5)              |
| Missing*                                                                        | 2                      |
| <b>Additional congenital anomaly:</b>                                           |                        |
| No                                                                              | 136 (72.3)             |
| Yes                                                                             | 52 (27.7)              |
| <b>Vertebral anomaly:</b>                                                       |                        |
| No                                                                              | 180 (95.7)             |
| Yes                                                                             | 8 (4.3)                |
| <b>Cardiac anomaly:</b>                                                         |                        |
| No                                                                              | 176 (93.6)             |
| Yes                                                                             | 12 (6.4)               |
| <b>Oesophageal atresia:</b>                                                     |                        |
| No                                                                              | 186 (98.9)             |
| Yes                                                                             | 2 (1.1)                |
| <b>Tracheo-oesophageal fistula:</b>                                             |                        |
| No                                                                              | 185 (98.4)             |
| Yes                                                                             | 3 (1.6)                |
| <b>Renal anomaly:</b>                                                           |                        |
| No                                                                              | 184 (97.9)             |
| Yes                                                                             | 4 (2.1)                |
| <b>Limb anomaly:</b>                                                            |                        |
| No                                                                              | 180 (95.7)             |
| Yes                                                                             | 8 (4.3)                |
| <b>Other anomaly:</b>                                                           |                        |
| No                                                                              | 158 (84.0)             |
| Yes                                                                             | 30 (16.0)              |
| <b>Septic on arrival?</b>                                                       |                        |
| No                                                                              | 146 (78.1)             |
| Yes                                                                             | 41 (21.9)              |
| Missing*                                                                        | 1                      |
| <b>Broad spectrum antibiotics within an hour of presentation?</b>               |                        |
| Yes                                                                             | 60 (32.4)              |
| Not within an hour, but on the first day                                        | 65 (35.1)              |
| Not on the first day of presentation                                            | 60 (32.4)              |
| Missing*                                                                        | 3                      |
| <b>Broad spectrum antibiotics for 48-hours postoperatively?</b>                 |                        |
| No                                                                              | 31 (17.8)              |
| Yes                                                                             | 143 (82.2)             |
| Missing*                                                                        | 14                     |
| <b>If ventilatory support was required, was it available?</b>                   |                        |
| No                                                                              | 60 (63.8)              |
| Yes                                                                             | 34 (36.2)              |
| NA, not required*                                                               | 88                     |
| Missing*                                                                        | 6                      |
| <b>Preoperative bowel perforation:</b>                                          |                        |
| No                                                                              | 179 (96.2)             |
| Yes                                                                             | 7 (3.8)                |
| Missing*                                                                        | 2                      |
| <b>Time from admission to primary intervention (days). Median, IQR (range)†</b> | 2, 1.5-4, (0-607)      |
| <b>Operation undertaken:</b>                                                    |                        |
| None, palliative care                                                           | 7 (3.8)                |

|                                                                                                                              |            |
|------------------------------------------------------------------------------------------------------------------------------|------------|
| None, spontaneous stooling                                                                                                   | 8 (4.3)    |
| Anal dilatation only                                                                                                         | 11 (5.9)   |
| Loop transverse colostomy                                                                                                    | 9 (4.9)    |
| Divided transverse colostomy                                                                                                 | 6 (3.2)    |
| Loop sigmoid colostomy                                                                                                       | 20 (10.8)  |
| Divided sigmoid colostomy                                                                                                    | 77 (41.6)  |
| Other stoma                                                                                                                  | 1 (0.5)    |
| Anoplasty                                                                                                                    | 17 (9.2)   |
| Posterior Sagittal Anorectoplasty (PSARP)                                                                                    | 27 (14.6)  |
| Abdominoperineal Anorectoplasty (APARP)                                                                                      | 1 (0.5)    |
| Modified Posterior Sagittal Anorectoplasty (PSARP)                                                                           | 1 (0.5)    |
| Missing*                                                                                                                     | 3          |
| <b>If primary anorectal reconstruction was undertaken, was the patient given a covering stoma?</b>                           |            |
| No                                                                                                                           | 32 (71.1)  |
| Yes                                                                                                                          | 13 (28.9)  |
| Missing*                                                                                                                     | 1          |
| <b>If anorectal reconstruction was undertaken, was a Peña stimulator or equivalent used to locate the sphincter complex?</b> |            |
| No                                                                                                                           | 5 (10.9)   |
| Yes                                                                                                                          | 23 (50.0)  |
| No, available but not used                                                                                                   | 2 (4.3)    |
| No, not available                                                                                                            | 16 (34.8)  |
| <b>Electrolyte disturbance within 30 days of surgery?</b>                                                                    |            |
| No                                                                                                                           | 128 (83.1) |
| Yes                                                                                                                          | 26 (16.9)  |
| NA*                                                                                                                          | 26         |
| Missing*                                                                                                                     | 8          |
| <b>High stoma output above 20mls/kg/day within 30 days of surgery?</b>                                                       |            |
| No                                                                                                                           | 120 (97.6) |
| Yes                                                                                                                          | 3 (2.4)    |
| NA*                                                                                                                          | 62         |
| Missing*                                                                                                                     | 3          |
| <b>Stoma prolapse within 30 days of surgery?</b>                                                                             |            |
| No                                                                                                                           | 118 (95.9) |
| Yes                                                                                                                          | 5 (4.1)    |
| NA*                                                                                                                          | 62         |
| Missing*                                                                                                                     | 3          |
| <b>Peri-stoma skin breakdown within 30 days of surgery?</b>                                                                  |            |
| No                                                                                                                           | 100 (82.6) |
| Yes                                                                                                                          | 21 (17.4)  |
| NA*                                                                                                                          | 62         |
| Missing*                                                                                                                     | 5          |
| <b>Sepsis within 30 days of surgery?</b>                                                                                     |            |
| No                                                                                                                           | 132 (85.7) |
| Yes                                                                                                                          | 22 (14.3)  |
| NA*                                                                                                                          | 26         |
| Missing*                                                                                                                     | 8          |
| <b>Anal stenosis within 30 days of surgery in those with primary anorectal reconstruction?</b>                               |            |
| No                                                                                                                           | 39 (84.8)  |
| Yes                                                                                                                          | 7 (15.2)   |
| NA*                                                                                                                          | 142        |
| <b>Plan for future surgical intervention:‡</b>                                                                               |            |
| Anoplasty/ pull-through at current centre                                                                                    | 118 (62.8) |
| Anoplasty/ pull-through elsewhere                                                                                            | 7 (3.7)    |
| Stoma closure at current hospital                                                                                            | 47 (25.0)  |
| Stoma closure elsewhere                                                                                                      | 0 (0.0)    |
| No further surgery planned                                                                                                   | 34 (18.1)  |

\* Excluded from percentage calculations. † Missing data, n=5. ‡ Some patients had more than one future planned intervention; total number of patients used as denominator. NA: Not applicable. Percentages have been rounded and may not total 100.

**Appendix Table 2c. Condition specific patient characteristics, management and outcomes for patients with intussusception, n=225** (data from 42 hospitals)

| Variable                                                                                     | Number of cases, n (%) |
|----------------------------------------------------------------------------------------------|------------------------|
| <b>Diagnosis of intussusception:</b>                                                         |                        |
| Clinically                                                                                   | 40 (17.8)              |
| Ultrasound                                                                                   | 175 (77.8)             |
| Other                                                                                        | 10 (4.4)               |
| <b>Septic on arrival?</b>                                                                    |                        |
| No                                                                                           | 123 (54.7)             |
| Yes                                                                                          | 102 (45.3)             |
| <b>Appropriate antibiotics given within an hour of diagnosis?</b>                            |                        |
| Yes                                                                                          | 132 (58.7)             |
| Not within an hour, but prior to intervention                                                | 82 (36.4)              |
| No, not prior to intervention                                                                | 11 (4.9)               |
| <b>If hypovolemic or septic, were intravenous fluids administered prior to intervention?</b> |                        |
| No                                                                                           | 20 (11.4)              |
| Yes                                                                                          | 156 (88.6)             |
| NA - not hypovolemic or septic*                                                              | 48                     |
| Missing*                                                                                     | 1                      |
| <b>Peritonitis as a contraindication for air- or hydro-enema reduction:</b>                  |                        |
| No                                                                                           | 184 (81.8)             |
| Yes                                                                                          | 41 (18.2)              |
| <b>Perforation as a contraindication for air- or hydro-enema reduction:</b>                  |                        |
| No                                                                                           | 209 (92.9)             |
| Yes                                                                                          | 16 (7.1)               |
| <b>Shock as a contraindication for air- or hydro-enema reduction:</b>                        |                        |
| No                                                                                           | 213 (94.7)             |
| Yes                                                                                          | 12 (5.3)               |
| <b>Other contraindication for air- or hydro-enema reduction:</b>                             |                        |
| No                                                                                           | 167 (74.2)             |
| Yes                                                                                          | 58 (25.8)              |
| <b>Contraindication for air- or hydro-enema reduction:</b>                                   |                        |
| No                                                                                           | 107 (47.6)             |
| Yes                                                                                          | 118 (52.4)             |
| <b>Management:</b>                                                                           |                        |
| Palliative care                                                                              | 7 (3.1)                |
| Air enema reduction                                                                          | 5 (2.2)                |
| Hydroenema reduction                                                                         | 53 (23.6)              |
| Primary laparotomy                                                                           | 158 (70.2)             |
| Spontaneous resolution                                                                       | 2 (0.9)                |
| <b>If air- or hydro-enema reduction were used primarily, was it successful?</b>              |                        |
| No                                                                                           | 18 (31.0)              |
| Yes                                                                                          | 40 (69.0)              |
| <b>If air- or hydro-enema reduction were used primarily, was there a complication?</b>       |                        |
| No                                                                                           | 53 (91.4)              |
| Yes, perforation                                                                             | 3 (5.2)                |
| Yes, other                                                                                   | 2 (3.5)                |
| <b>If surgical intervention was required, what intervention was undertaken?</b>              |                        |
| Manual reduction                                                                             | 63 (35.6)              |
| Bowel resection and primary anastomosis                                                      | 107 (60.5)             |
| Bowel resection and stoma                                                                    | 7 (4.0)                |
| NA*                                                                                          | 48                     |
| <b>Recurrence within 30-days:</b>                                                            |                        |
| Yes                                                                                          | 4 (1.8)                |
| No (followed-up to 30-days)                                                                  | 46 (20.7)              |
| No, but not followed-up post-discharge                                                       | 172 (77.5)             |
| Missing*                                                                                     | 3                      |

\* Excluded from percentage calculations. NA: Not applicable. Percentages have been rounded and may not total 100.

**Appendix Table 2d. Condition specific patient characteristics, management and outcomes for patients with appendicitis, n=250** (Data from 41 hospitals)

| Variable                                                                              | Number of cases, n (%) |
|---------------------------------------------------------------------------------------|------------------------|
| <b>Septic on arrival?</b>                                                             |                        |
| No                                                                                    | 110 (44.0)             |
| Yes                                                                                   | 140 (56.0)             |
| <b>Appropriate antibiotics given within an hour of diagnosis?</b>                     |                        |
| Yes                                                                                   | 152 (60.8)             |
| Not within an hour, but on the first day                                              | 96 (38.4)              |
| Not on the first day of admission                                                     | 2 (0.8)                |
| <b>If hypovolemic or septic, were intravenous fluids administered preoperatively?</b> |                        |
| No                                                                                    | 13 (7.7)               |
| Yes                                                                                   | 155 (92.3)             |
| NA*                                                                                   | 82                     |
| <b>Time from admission to surgery (hours). Median, IQR (range)</b>                    | 12, 6-24 (0-150)       |
| <b>Time of operation (24 hour clock):</b>                                             |                        |
| Between 8am to midnight                                                               | 205 (84.7)             |
| Between midnight to 8am                                                               | 37 (15.3)              |
| Missing*                                                                              | 8                      |
| <b>Management:</b>                                                                    |                        |
| Open appendicectomy (Lanz/ Gridiron)                                                  | 163 (65.2)             |
| Laparotomy                                                                            | 55 (22.0)              |
| Laparoscopic appendicectomy                                                           | 25 (10.0)              |
| Open right hemicolectomy                                                              | 1 (0.4)                |
| Non-operative, mass palpated preoperatively                                           | 1 (0.4)                |
| Non-operative, mass palpated under anesthetic                                         | 2 (0.8)                |
| Other                                                                                 | 3 (1.2)                |
| <b>Conversion to open from laparoscopic:</b>                                          |                        |
| No                                                                                    | 24 (96.0)              |
| Yes                                                                                   | 1 (4.0)                |
| <b>Operation findings:</b>                                                            |                        |
| Simple appendicitis                                                                   | 105 (42.9)             |
| Perforated appendicitis                                                               | 140 (57.1)             |
| NA*                                                                                   | 3                      |
| Missing*                                                                              | 2                      |
| <b>Peritoneal cavity washout prior to closure?</b>                                    |                        |
| No                                                                                    | 89 (36.3)              |
| Yes                                                                                   | 156 (63.7)             |
| NA*                                                                                   | 5                      |
| <b>Washout used:</b>                                                                  |                        |
| Normal saline                                                                         | 141 (95.9)             |
| Betadine                                                                              | 2 (1.4)                |
| Other                                                                                 | 4 (2.7)                |
| NA - no washout                                                                       | 89                     |
| Missing*                                                                              | 14                     |
| <b>Duration of postoperative intravenous antibiotics (days). Median, IQR (range)</b>  | 3, 2-5 (0-35)          |
| <b>Duration of postoperative oral antibiotics (days). Median, IQR (range)</b>         | 5, 2-7 (0-36)          |
| <b>Postoperative intra-abdominal collection:</b>                                      |                        |
| No                                                                                    | 225 (90.4)             |
| Yes, requiring antibiotics only                                                       | 5 (2.0)                |
| Yes, percutaneous drainage without imaging                                            | 2 (0.8)                |
| Yes, surgical drainage                                                                | 14 (5.6)               |
| NA                                                                                    | 3 (1.2)                |
| Missing*                                                                              | 1                      |

| Variable                                                                                          | Number of cases, n (%) |
|---------------------------------------------------------------------------------------------------|------------------------|
| <b>If yes, how was the collection diagnosed?</b>                                                  |                        |
| Clinically                                                                                        | 7 (33.3)               |
| Ultrasound                                                                                        | 13 (61.9)              |
| CT                                                                                                | 1 (4.8)                |
| <b>If the collection was visualised on imaging or at operation, was it above 5cm in diameter?</b> |                        |
| No                                                                                                | 4 (28.6)               |
| Yes                                                                                               | 10 (71.4)              |

\* Excluded from percentage calculations. CT: Computer tomography. IQR: Interquartile range. NA: Not applicable.

**Appendix Table 2e. Condition specific patient characteristics, management and outcomes for patients with inguinal hernia, n=633** (Data from 50 centres)

| Variable                                                                                           | Number of cases, n (%) |
|----------------------------------------------------------------------------------------------------|------------------------|
| <b>Type of hernia:</b>                                                                             |                        |
| Easily reducible                                                                                   | 532 (84.2)             |
| Reduced with difficulty                                                                            | 41 (6.5)               |
| Incarcerated, obstructed or strangulated                                                           | 57 (9.0)               |
| Fistulated                                                                                         | 2 (0.3)                |
| Missing*                                                                                           | 1                      |
| <b>Unilateral</b>                                                                                  | 561 (88.6)             |
| <b>Bilateral</b>                                                                                   | 72 (11.4)              |
| <b>Operation type:</b>                                                                             |                        |
| Elective                                                                                           | 570 (90.5)             |
| Emergency                                                                                          | 63 (9.5)               |
| <b>Operation undertaken:</b>                                                                       |                        |
| Open herniotomy                                                                                    | 619 (97.8)             |
| Laparoscopic herniotomy                                                                            | 5 (0.8)                |
| Laparotomy                                                                                         | 7 (1.1)                |
| Other                                                                                              | 2 (0.3)                |
| <b>Conversion from laparoscopic to open?</b>                                                       |                        |
| No                                                                                                 | 5 (100.0)              |
| Yes                                                                                                | 0 (0.0)                |
| <b>Bowel resection required?</b>                                                                   |                        |
| No                                                                                                 | 616 (97.3)             |
| Yes, with primary anastomosis via inguinal incision                                                | 7 (1.1)                |
| Yes, with primary anastomosis via laparotomy                                                       | 8 (1.3)                |
| Yes, requiring a stoma                                                                             | 1 (0.2)                |
| Yes, other                                                                                         | 1 (0.2)                |
| <b>Testis gangrenous at the time of operation?</b>                                                 |                        |
| No                                                                                                 | 615 (97.5)             |
| Yes                                                                                                | 16 (2.5)               |
| Missing*                                                                                           | 2                      |
| <b>Broad spectrum antibiotics given at the time of operation:</b>                                  |                        |
| No                                                                                                 | 379 (60.0)             |
| Yes                                                                                                | 253 (40.0)             |
| Missing*                                                                                           | 1                      |
| <b>Duration of broad spectrum antibiotics given following surgery (days). Median, IQR (range)†</b> | 0, 0-2 (0-21)          |
| <b>Recurrence within 30 days of surgery:</b>                                                       |                        |
| Yes                                                                                                | 8 (1.3)                |
| No, but no follow-up post-discharge                                                                | 82 (13.1)              |
| No, followed-up in person                                                                          | 405 (64.5)             |
| No, followed-up via the telephone                                                                  | 93 (14.8)              |
| No, other follow-up undertaken                                                                     | 40 (6.4)               |
| Missing*                                                                                           | 5                      |
| <b>Overnight stay at the hospital with apnoea and saturation monitoring?</b>                       |                        |
| No, same day discharge                                                                             | 160 (25.3)             |
| Admitted, but not monitored                                                                        | 132 (20.9)             |
| Yes                                                                                                | 340 (53.8)             |
| Missing*                                                                                           | 1                      |

\* Excluded from percentage calculations. † Missing data, n=3. IQR: Interquartile range. Percentages have been rounded and may not total 100.

**Appendix Table 3. Mortality stratified by age**

| <b>Age</b>                    | <b>Neonate (0-28 days)<br/>% (no. deaths/ no. neonates)</b> | <b>Infant (29 – 364 days)<br/>% (no. deaths/ no. infants)</b> | <b>Child (1 – 16 years)<br/>% (no. deaths/ no. children)</b> |
|-------------------------------|-------------------------------------------------------------|---------------------------------------------------------------|--------------------------------------------------------------|
| <b>Gastroschisis</b>          | 75.5% (83/110)                                              | 0.0% (0/0)                                                    | 0.0% (0/0)                                                   |
| <b>Anorectal malformation</b> | 21.5% (28/130)                                              | 0.0% (0/37)                                                   | 20.0% (4/20)                                                 |
| <b>Intussusception</b>        | 100.0% (1/1)                                                | 9.5% (18/189)                                                 | 5.8% (2/34)                                                  |
| <b>Appendicitis</b>           | 0.0% (0/0)                                                  | 0.0% (0/0)                                                    | 0.4% (1/248)                                                 |
| <b>Inguinal hernia</b>        | 0.0% (0/26)                                                 | 1.1% (2/177)                                                  | 0.0% (0/418)                                                 |
| <b>All patients*</b>          | 41.9% (112/267)                                             | 5.0% (20/403)                                                 | 1.0% (7/720)                                                 |

\* Missing data, n=17 (Gastroschisis n=1, ARM n=1, Intussusception n=1, Appendicitis n=2, Inguinal hernia n=12)

**Appendix Table 4. Patient follow-up**

| <b>Variable</b>                                                                               | <b>All conditions<br/>(n=1407), n (%)</b> | <b>Gastroschisis<br/>(n=111), n (%)</b> | <b>Anorectal<br/>malformation<br/>(n=188), n (%)</b> | <b>Intussusception<br/>(n=225), n (%)</b> | <b>Appendicitis<br/>(n=250), n (%)</b> | <b>Inguinal<br/>hernia<br/>(n=633), n (%)</b> |
|-----------------------------------------------------------------------------------------------|-------------------------------------------|-----------------------------------------|------------------------------------------------------|-------------------------------------------|----------------------------------------|-----------------------------------------------|
| <b>Was the patient alive at 30 days post-intervention?</b>                                    |                                           |                                         |                                                      |                                           |                                        |                                               |
| Yes                                                                                           | 1037 (73.7)                               | 16 (14.4)                               | 118 (62.8)                                           | 166 (73.8)                                | 206 (82.4)                             | 531 (83.9)                                    |
| No (died in hospital)                                                                         | 127 (9.0)                                 | 83 (74.8)                               | 21 (11.2)                                            | 21 (9.3)                                  | 1 (0.4)                                | 1 (0.2)                                       |
| No (died after discharge)                                                                     | 12 (0.9)                                  | 0 (0.0)                                 | 11 (5.8)                                             | 0 (0.0)                                   | 0 (0.0)                                | 1 (0.2)                                       |
| Not followed-up to 30 days                                                                    | 211 (15.0)                                | 11 (9.9)                                | 35 (18.6)                                            | 33 (14.7)                                 | 39 (15.6)                              | 93 (14.7)                                     |
| Missing                                                                                       | 20 (1.4)                                  | 1 (0.9)                                 | 3 (1.6)                                              | 5 (2.2)                                   | 4 (1.6)                                | 7 (1.1)                                       |
| <b>Was the patient followed-up to 30 days post-intervention to assess for complications?*</b> |                                           |                                         |                                                      |                                           |                                        |                                               |
| Yes                                                                                           | 1030 (73.2)                               | 78 (70.3)                               | 108 (57.4)                                           | 152 (67.6)                                | 190 (76.0)                             | 502 (79.3)                                    |
| No                                                                                            | 358 (25.4)                                | 26 (23.4)                               | 75 (39.9)                                            | 72 (32.0)                                 | 58 (23.2)                              | 127 (20.1)                                    |
| Missing                                                                                       | 19 (1.3)                                  | 7 (6.3)                                 | 5 (2.7)                                              | 1 (0.4)                                   | 2 (0.8)                                | 4 (0.6)                                       |

\* Or followed-up until death if prior to 30 days.

**Appendix Table 5. Univariable and multivariable analysis of patient-level and hospital-level factors associated with mortality for patients with gastroschisis, anorectal malformation and intussusception combined (generic patient variables only)**

|                                                 | Alive<br>(n=396),<br>n (%) | Dead<br>(n=125),<br>n (%) | Univariable analysis |            | Multivariable analysis of<br>patient variables |            | Multivariable analysis of<br>patient and hospital variables |         |
|-------------------------------------------------|----------------------------|---------------------------|----------------------|------------|------------------------------------------------|------------|-------------------------------------------------------------|---------|
|                                                 |                            |                           | OR (95% CI)          | P<br>value | OR (95% CI)                                    | P<br>value | OR (95% CI)                                                 | P value |
| Patient level variables                         |                            |                           |                      |            |                                                |            |                                                             |         |
| Condition: Gastroschisis                        | 27 (6.8)                   | 83 (66.4)                 | reference            |            | reference                                      |            | reference                                                   |         |
| Condition: ARM                                  | 166 (41.9)                 | 21 (16.8)                 | 0.04 (0.02,0.07)     | <0.001     | 0.07 (0.02,0.18)                               | <0.001     | 0.09 (0.03, 0.25)                                           | <0.001  |
| Condition: Intussusception                      | 203 (51.3)                 | 21 (16.8)                 | 0.03 (0.02,0.06)     | <0.001     | 0.03 (0.01,0.10)                               | <0.001     | 0.04 (0.01,0.14)                                            | <0.001  |
| Gestational age at birth, median (IQR)          | 38 (37,40)                 | 37 (36,38)                | 0.67 (0.59,0.77)     | <0.001     | **                                             | **         | **                                                          | **      |
| Male                                            | 229 (57.8)                 | 67 (53.6)                 | 0.96 (0.62,1.50)     | 0.87       |                                                |            |                                                             |         |
| Weight at presentation in kg, median (IQR)      | 6.5 (3.2,8.0)              | 2.5 (2.0,3.0)             | 0.67 (0.60,0.75)     | <0.001     | 1.00 (0.87,1.17)                               | 0.952      | 1.01 (0.87,1.16)                                            | 0.926   |
| Time to presentation in days, median (IQR)      | 3.0 (2.0,7.0)              | 1.5 (1.0,3.0)             | 0.86 (0.78,0.95)     | 0.002      | 0.97 (0.91,1.03)                               | 0.313      | 0.97 (0.91,1.03)                                            | 0.273   |
| Distance from home in km, median (IQR)          | 30 (14,81)                 | 40 (15,140)               | 1.00 (1.00,1.00)     | 0.853      |                                                |            |                                                             |         |
| Mode of transport: Ambulance/ health vehicle    | 59 (15.0)                  | 43 (34.7)                 | reference            |            | reference                                      |            | reference                                                   |         |
| Mode of transport: Patient's own                | 329 (83.7)                 | 75 (60.5)                 | 0.33 (0.18,0.60)     | <0.001     | 0.73 (0.30,1.78)                               | 0.482      | 0.67 (0.26,1.69)                                            | 0.393   |
| ASA score: 1-2                                  | 278 (70.2)                 | 31 (25.0)                 | reference            |            | reference                                      |            | reference                                                   |         |
| ASA score: 3-5                                  | 98 (24.7)                  | 82 (66.1)                 | 9.34 (5.13,17.03)    | <0.001     | 3.91 (1.74,8.79)                               | 0.001      | 3.31 (1.44,7.63)                                            | 0.005   |
| ASA score: NA, No intervention                  | 20 (5.1)                   | 11 (8.9)                  | 6.65 (2.54,17.42)    | <0.001     | 0.58 (0.10,3.34)                               | 0.539      | 0.58 (0.10,3.43)                                            | 0.546   |
| WHO checklist used: No                          | 186 (47.0)                 | 74 (59.2)                 | reference            |            | reference                                      |            | reference                                                   |         |
| WHO checklist used: Yes                         | 184 (46.5)                 | 27 (21.6)                 | 0.37 (0.20,0.67)     | 0.001      | 0.69 (0.3,1.59)                                | 0.382      | 0.74 (0.31,1.74)                                            | 0.486   |
| WHO checklist used: NA, no intervention         | 26 (6.6)                   | 24 (19.2)                 | 3.09 (1.49,6.43)     | 0.002      | 0.85 (0.15,4.78)                               | 0.858      | 0.84 (0.15,4.75)                                            | 0.846   |
| Anaesthetic, General Anaesthetic: Yes           | 311 (78.5)                 | 48 (38.4)                 | reference            |            | reference                                      |            | reference                                                   |         |
| Anaesthetic, General Anaesthetic: No            | 55 (13.9)                  | 43 (34.4)                 | 4.83 (2.63,8.88)     | <0.001     | 1.11 (0.41,2.98)                               | 0.833      | 1.23 (0.45,3.41)                                            | 0.685   |
| Anaesthetic, NA, no intervention                | 30 (7.6)                   | 34 (27.2)                 | 9.86 (4.99,19.52)    | <0.001     | 10.48 (2.07,52.97)                             | 0.004      | 10.33 (1.98,53.94)                                          | 0.006   |
| Anaesthetist: Doctor                            | 240 (60.6)                 | 36 (28.8)                 | reference            |            | **                                             | **         | **                                                          | **      |
| Anaesthetist: Non-doctor                        | 102 (25.8)                 | 49 (39.2)                 | 3.08 (1.67,5.68)     | <0.001     | **                                             | **         | **                                                          | **      |
| Anaesthetist: NA, no anaesthetic                | 54 (13.6)                  | 40 (32.0)                 | 7.35 (3.88,13.93)    | <0.001     | **                                             | **         | **                                                          | **      |
| Blood transfusion: Yes                          | 107 (27.4)                 | 42 (36.2)                 | 1.81 (1.08,3.04)     | 0.024      | 3.72 (1.59,8.68)                               | 0.002      | 3.95 (1.70,9.19)                                            | 0.001   |
| Surgical site infection: Yes                    | 83 (21.2)                  | 19 (15.8)                 | 0.73 (0.40,1.33)     | 0.303      |                                                |            |                                                             |         |
| Wound dehiscence: Yes                           | 29 (7.4)                   | 2 (1.7)                   | 0.18 (0.04,0.82)     | 0.027      | **                                             | **         | **                                                          | **      |
| Further intervention: Yes                       | 47 (12.0)                  | 13 (11.0)                 | 0.80 (0.39,1.64)     | 0.538      |                                                |            |                                                             |         |
| Hospital level variables                        |                            |                           |                      |            |                                                |            |                                                             |         |
| Paediatric surgeons/million children, mean (SD) | 2.18 (0.84)                | 2.28 (0.83)               | 1.10 (0.73,1.65)     | 0.651      |                                                |            |                                                             |         |
| Personnel: low                                  | 56 (15.8)                  | 3 (2.7)                   | reference            |            |                                                |            | **                                                          | **      |
| Personnel: medium                               | 255 (71.8)                 | 96 (85.0)                 | 6.41 (1.50,27.32)    | 0.012      |                                                |            | **                                                          | **      |
| Personnel: high                                 | 44 (12.4)                  | 14 (12.4)                 | 4.98 (0.97,25.57)    | 0.054      |                                                |            | **                                                          | **      |

|                                       | Alive<br>(n=396),<br>n (%) | Dead<br>(n=125),<br>n (%) | Univariable analysis |                  | Multivariable analysis of<br>patient variables |            | Multivariable analysis of<br>patient and hospital variables |         |
|---------------------------------------|----------------------------|---------------------------|----------------------|------------------|------------------------------------------------|------------|-------------------------------------------------------------|---------|
|                                       |                            |                           | OR (95% CI)          | P<br>value       | OR (95% CI)                                    | P<br>value | OR (95% CI)                                                 | P value |
| Infrastructure: low                   | 55 (14.2)                  | 11 (9.4)                  | reference            |                  |                                                |            |                                                             |         |
| Infrastructure: medium                | 240 (62.2)                 | 70 (59.8)                 | 1.39 (0.50,3.91)     | 0.528            |                                                |            |                                                             |         |
| Infrastructure: high                  | 91 (23.6)                  | 36 (30.8)                 | 1.23 (0.37,4.13)     | 0.732            |                                                |            |                                                             |         |
| Procedure: low                        | 80 (20.7)                  | 57 (48.7)                 | reference            |                  |                                                |            | reference                                                   |         |
| Procedure: medium                     | 268 (69.4)                 | 47 (40.2)                 | 0.29 (0.15,0.54)     | <b>&lt;0.001</b> |                                                |            | 0.44 (0.18,1.05)                                            | 0.064   |
| Procedure: high                       | 38 (9.8)                   | 13 (11.1)                 | 0.54 (0.22,1.30)     | 0.167            |                                                |            | 0.65 (0.18,2.32)                                            | 0.509   |
| Anaesthetic and resuscitation: low    | 54 (14.0)                  | 11 (9.4)                  | reference            |                  |                                                |            |                                                             |         |
| Anaesthetic and resuscitation: medium | 222 (57.5)                 | 73 (62.4)                 | 1.51 (0.54,4.22)     | 0.432            |                                                |            |                                                             |         |
| Anaesthetic and resuscitation: high   | 110 (28.5)                 | 33 (28.2)                 | 1.36 (0.46,4.05)     | 0.578            |                                                |            |                                                             |         |

\*\* Excluded from the multivariable model due to collinearity or low counts. ARM: Anorectal malformation. ASA: American Association of Anesthesiologists. CI: Confidence interval. IQR: Interquartile range. NA: Not applicable. OR: Odds ratio. SD: Standard deviation. WHO: World Health Organisation. Percentages have been rounded and may not total 100.

**Appendix Table 6. Univariable analysis of patient-level and hospital-level factors associated with mortality for patients with gastroschisis (generic and condition specific variables)**

|                                                                                                 | Alive<br>(n=27),<br>n (%) | Dead<br>(n=83),<br>n (%) | Univariable analysis |              |
|-------------------------------------------------------------------------------------------------|---------------------------|--------------------------|----------------------|--------------|
|                                                                                                 |                           |                          | OR (95% CI)          | P value      |
| Patient level variables: <i>generic</i>                                                         |                           |                          |                      |              |
| Gestational age at birth, median (IQR)                                                          | 38 (36,40)                | 36 (35,38)               | *                    | *            |
| Male sex                                                                                        | 8 (30)                    | 39 (47)                  | 2.40 (0.86,6.74)     | 0.095        |
| Weight in kg, mean (SD)                                                                         | 2.50 (0.46)               | 2.26 (0.53)              | 0.40 (0.14,1.10)     | 0.076        |
| Time to presentation in days, median (IQR)                                                      | 1 (1,1)                   | 1 (1,2)                  | 1.16 (0.75,1.79)     | 0.502        |
| Distance from home in km, median (IQR)                                                          | 60 (22,195)               | 58 (16,153)              | 1.00 (0.99,1.00)     | 0.472        |
| Place of birth: Outborn                                                                         | 25 (93)                   | 76 (93)                  | 1.01 (0.17,6.19)     | 0.987        |
| ASA score: 1-2                                                                                  | 17 (63)                   | 18 (22)                  | reference            |              |
| ASA score: 3-5                                                                                  | 9 (33)                    | 54 (66)                  | 7.98 (1.70,37.40)    | <b>0.008</b> |
| ASA score: NA, no intervention                                                                  | 1 (4)                     | 10 (12)                  | 9.79 (0.98,98.07)    | 0.052        |
| WHO Checklist used: No                                                                          | 8 (30)                    | 51 (61)                  | *                    | *            |
| WHO Checklist used: Yes                                                                         | 17 (63)                   | 14 (17)                  | *                    | *            |
| WHO Checklist used: NA                                                                          | 2 (7)                     | 18 (22)                  | *                    | *            |
| Anaesthetic: General anaesthetic                                                                | 16 (59)                   | 20 (24)                  | reference            |              |
| Anaesthetic: No general anaesthetic                                                             | 9 (33)                    | 39 (47)                  | 4.48 (1.02,19.66)    | <b>0.047</b> |
| Anaesthetic: NA, no intervention                                                                | 2 (7)                     | 24 (29)                  | 13.28 (2.04,86.24)   | <b>0.007</b> |
| Anaesthetist: Doctor                                                                            | 13 (48)                   | 15 (18)                  | reference            |              |
| Anaesthetist: Non-doctor                                                                        | 11 (41)                   | 38 (46)                  | 3.46 (0.86,13.91)    | 0.08         |
| Anaesthetist: NA, no anaesthetic                                                                | 3 (11)                    | 30 (36)                  | 12.16 (2.18,67.77)   | <b>0.004</b> |
| Blood transfusion: No                                                                           | 9 (33)                    | 16 (19)                  | 0.51 (0.17,1.52)     | 0.226        |
| Surgical site infection: Yes                                                                    | 6 (25)                    | 14 (20)                  | 0.68 (0.20,2.33)     | 0.536        |
| Wound dehiscence: Yes                                                                           | 2 (8)                     | 1 (1)                    | 0.06 (0.00,1.26)     | 0.070        |
| Further unplanned intervention: Yes                                                             | 5 (21)                    | 10 (14)                  | 0.48 (0.12,1.97)     | 0.311        |
| Patient level variables: <i>condition specific</i>                                              |                           |                          |                      |              |
| Gastroschisis type: Complex                                                                     | 3 (11)                    | 28 (34)                  | 4.39 (1.12,17.20)    | <b>0.034</b> |
| Antenatal diagnosis: Yes                                                                        | 2 (7)                     | 3 (4)                    | 0.42 (0.05,3.25)     | 0.407        |
| Septic at presentation: Yes                                                                     | 12 (44)                   | 48 (59)                  | 2.33 (0.76,7.15)     | 0.140        |
| Warmed if hypothermic on arrival: No                                                            | 4 (15)                    | 14 (17)                  | reference            |              |
| Warmed if hypothermic on arrival: Yes                                                           | 15 (56)                   | 50 (60)                  | 0.99 (0.23,4.18)     | 0.989        |
| Warmed if hypothermic on arrival: NA                                                            | 8 (30)                    | 19 (23)                  | 0.58 (0.12,2.72)     | 0.487        |
| Hypovolaemic on arrival: Yes                                                                    | 9 (33)                    | 55 (66)                  | 7.84 (1.96,31.34)    | <b>0.004</b> |
| IV bolus within 1 hour of arrival: Yes                                                          | 12 (46)                   | 46 (55)                  | 1.87 (0.64,5.50)     | 0.253        |
| Peripheral cannula day 1: Yes                                                                   | 24 (89)                   | 79 (95)                  | 2.79 (0.49,15.80)    | 0.245        |
| Umbilical catheter day 1: Yes                                                                   | 2 (7)                     | 5 (6)                    | 0.63 (0.09,4.25)     | 0.639        |
| Other central line day 1: Yes                                                                   | 3 (11)                    | 2 (2)                    | 0.17 (0.02,1.46)     | 0.106        |
| Time to intervention in hours, median (IQR)                                                     | 6.5 (2.3,15.8)            | 7.5 (4.0,16.5)           | 1.00 (0.98,1.02)     | 0.820        |
| Intervention: primary closure at the cotside or in the OR or surgical silo at the cotside or OR | 22 (85)                   | 35 (42)                  | *                    | *            |
| Intervention: preformed silo at the cotside                                                     | 4 (15)                    | 29 (35)                  | *                    | *            |
| Intervention: palliative care                                                                   | 0 (0)                     | 19 (22)                  | *                    | *            |
| Days to closure, median (IQR)                                                                   | 2 (1,5)                   | 0 (0,2)                  | 0.90 (0.77,1.04)     | 0.145        |
| Ventilation available when required: No                                                         | 10 (37)                   | 25 (30)                  | reference            |              |
| Ventilation available when required: Yes                                                        | 8 (30)                    | 27 (33)                  | 0.89 (0.20,3.96)     | 0.876        |
| Ventilation available: NA, not required                                                         | 9 (33)                    | 31 (37)                  | 0.99 (0.26,3.88)     | 0.994        |
| Parenteral nutrition received: Yes                                                              | 11 (41)                   | 30 (36)                  | 0.30 (0.06,1.43)     | 0.132        |
| Ischaemic bowel following intervention: No                                                      | 24 (92)                   | 35 (43)                  | *                    | *            |
| Ischaemic bowel following intervention: Yes                                                     | 0 (0)                     | 25 (31)                  | *                    | *            |
| Ischaemic bowel following intervention: NA                                                      | 2 (8)                     | 22 (27)                  | *                    | *            |
| ACS following intervention: No                                                                  | 23 (89)                   | 30 (38)                  | *                    | *            |
| ACS following intervention: Yes                                                                 | 0 (0)                     | 9 (11)                   | *                    | *            |
| ACS following intervention: NA                                                                  | 3 (12)                    | 40 (51)                  | *                    | *            |
| If ACS developed, abdomen re-opened: No                                                         | 0 (0)                     | 6 (60)                   | *                    | *            |

|                                                 | Alive<br>(n=27),<br>n (%) | Dead<br>(n=83),<br>n (%) | Univariable analysis |              |
|-------------------------------------------------|---------------------------|--------------------------|----------------------|--------------|
|                                                 |                           |                          | OR (95% CI)          | P value      |
| If ACS developed, abdomen re-opened: Yes        | 0 (0)                     | 3 (30)                   | *                    | *            |
| If ACS developed, abdomen re-opened: NA         | 0 (0)                     | 1 (10)                   | *                    | *            |
| Central line sepsis: No                         | 12 (46)                   | 28 (35)                  | *                    | *            |
| Central line sepsis: Yes                        | 1 (4)                     | 3 (4)                    | *                    | *            |
| Central line sepsis: NA                         | 13 (50)                   | 48 (61)                  | *                    | *            |
| <b>Hospital level variables</b>                 |                           |                          |                      |              |
| Paediatric surgeons/million children, mean (SD) | 2.21 (0.83)               | 2.42 (0.74)              | 1.43 (0.62,3.28)     | 0.399        |
| Personnel: low                                  | 0 (0)                     | 2 (3)                    | *                    | *            |
| Personnel: medium                               | 20 (83)                   | 66 (89)                  | *                    | *            |
| Personnel: high                                 | 4 (17)                    | 6 (8)                    | *                    | *            |
| Infrastructure: low                             | 1 (4)                     | 9 (12)                   | reference            |              |
| Infrastructure: medium                          | 11 (46)                   | 34 (45)                  | 0.33 (0.02,4.59)     | 0.408        |
| Infrastructure: high                            | 12 (50)                   | 33 (43)                  | 0.13 (0.01,2.32)     | 0.167        |
| Procedure: low                                  | 8 (33)                    | 42 (55)                  | reference            |              |
| Procedure: medium                               | 7 (29)                    | 25 (33)                  | 0.70 (0.18,2.78)     | 0.610        |
| Procedure: high                                 | 9 (38)                    | 9 (12)                   | 0.16 (0.03,0.84)     | <b>0.031</b> |
| Anaesthesia and Resuscitation: low              | 4 (17)                    | 5 (7)                    | reference            |              |
| Anaesthesia and Resuscitation: medium           | 14 (58)                   | 51 (67)                  | 2.77 (0.42,18.13)    | 0.289        |
| Anaesthesia and Resuscitation: high             | 6 (25)                    | 20 (26)                  | 2.58 (0.34,19.75)    | 0.362        |

\* Univariable analysis not possible due to low/zero counts or singularity of random intercept.

ACS: Abdominal compartment syndrome. ASA: American Association of Anesthesiologists. CI: Confidence interval. IQR: Interquartile range. NA: Not applicable. OR: Odds ratio. SD: Standard deviation. WHO: World Health Organisation.

Percentages have been rounded and may not total 100.

**Appendix Table 7. Univariable analysis of patient-level and hospital-level factors associated with mortality for patients with ARM (generic and condition specific variables)**

|                                                  | Alive<br>(n=167),<br>n (%) | Dead<br>(n=21),<br>n (%) | Univariable analysis |                  |
|--------------------------------------------------|----------------------------|--------------------------|----------------------|------------------|
|                                                  |                            |                          | OR (95% CI)          | P value          |
| Patient level variables: generic                 |                            |                          |                      |                  |
| Gestational age, median (IQR)                    | 38 (37,38)                 | 38 (37,38)               | 0.89 (0.66,1.20)     | 0.450            |
| Male sex                                         | 88 (53)                    | 15 (71)                  | 2.70 (0.88,8.30)     | 0.082            |
| Weight in kg, median (IQR)                       | 3.4 (2.8,7.0)              | 2.9<br>(2.5,3.1)         | 0.64 (0.44,0.95)     | <b>0.025</b>     |
| Time to presentation in days, median (IQR)       | 5 (3,120)                  | 3 (2,5)                  | 0.94 (0.85,1.04)     | 0.251            |
| Distance from home in km, median (IQR)           | 50 (25,150)                | 30 (14,59)               | 1.00 (0.99,1.00)     | 0.231            |
| Mode of transport: Ambulance/ healthcare vehicle | 28 (17)                    | 3 (14)                   | reference            |                  |
| Mode of transport: Patient's own                 | 135 (83)                   | 18 (86)                  | 1.45 (0.31,6.83)     | 0.641            |
| ASA score: 1-2                                   | 125 (82)                   | 7 (35)                   | reference            |                  |
| ASA score: 3-5                                   | 28 (18)                    | 13 (65)                  | 9.84 (2.75,35.28)    | <b>&lt;0.001</b> |
| WHO Checklist used: No                           | 62 (37)                    | 7 (33)                   | reference            |                  |
| WHO Checklist used: Yes                          | 85 (51)                    | 8 (38)                   | 0.69 (0.21,2.25)     | 0.540            |
| WHO Checklist used: NA                           | 20 (12)                    | 6 (29)                   | 1.06 (0.20,5.55)     | 0.941            |
| Anaesthetic: General anaesthetic                 | 140 (84)                   | 12 (57)                  | reference            |                  |
| Anaesthetic: No general anaesthetic              | 7 (4)                      | 3 (14)                   | 5.36 (1.00,28.90)    | 0.051            |
| Anaesthetic: NA, no intervention                 | 20 (12)                    | 6 (29)                   | 2.96 (0.82,10.76)    | 0.099            |
| Anaesthetist: Doctor                             | 106 (64)                   | 8 (38)                   | reference            |                  |
| Anaesthetist: Non-doctor                         | 41 (25)                    | 7 (33)                   | 2.29 (0.66,7.98)     | 0.194            |
| Anaesthetist: NA                                 | 20 (12)                    | 6 (29)                   | 3.20 (0.82,12.49)    | 0.095            |
| Blood transfusion: Yes                           | 26 (16)                    | 10 (50)                  | 5.53 (1.87,16.39)    | <b>0.002</b>     |
| Surgical site infection: Yes                     | 34 (23)                    | 3 (23)                   | 1.06 (0.22,5.25)     | 0.940            |
| Wound dehiscence: Yes                            | 14 (10)                    | 1 (8)                    | 0.96 (0.09,10.50)    | 0.973            |
| Further intervention: Yes                        | 18 (12)                    | 1 (7)                    | 0.62 (0.07,5.60)     | 0.668            |
| Patient level variables: condition specific      |                            |                          |                      |                  |
| Type: High                                       | 79 (48)                    | 15 (71)                  | 2.71 (0.92,7.98)     | 0.070            |
| No additional anomalies: Yes                     | 126 (75)                   | 10 (48)                  | 0.24 (0.08,0.73)     | <b>0.012</b>     |
| Septic on arrival: Yes                           | 28 (17)                    | 13 (62)                  | 8.55 (2.89,25.34)    | <b>&lt;0.001</b> |
| Antibiotics within an hour of arrival: Yes       | 52 (32)                    | 8 (38)                   | 1.42 (0.49,4.16)     | 0.521            |
| Antibiotics for 48hours post-op: Yes             | 128 (83)                   | 15 (79)                  | 0.82 (0.20,3.41)     | 0.788            |
| Ventilation available when required: No          | 48 (30)                    | 12 (57)                  | reference            |                  |
| Ventilation available when required: Yes         | 30 (19)                    | 4 (19)                   | 0.60 (0.15,2.40)     | 0.469            |
| Ventilation available: NA, not required          | 83 (52)                    | 5 (24)                   | 0.24 (0.07,0.82)     | <b>0.022</b>     |
| Pre-op bowel perforation: Yes                    | 6 (4)                      | 1 (5)                    | 1.63 (0.14,18.54)    | 0.692            |
| Time to intervention in days, median (IQR)       | 2 (1,4)                    | 2 (1,2)                  | 0.81 (0.62,1.06)     | 0.127            |
| Intervention: Stoma                              | 100 (61)                   | 13 (62)                  | reference            |                  |
| Intervention: Anorectal reconstruction           | 44 (27)                    | 2 (10)                   | 0.35 (0.07,1.70)     | 0.194            |
| Intervention: Other                              | 19 (12)                    | 2 (10)                   | 0.72 (0.13,4.01)     | 0.704            |
| Intervention: Palliative care                    | 1 (1)                      | 4 (19)                   | 25.91 (2.21,303.3)   | 0.01             |
| Pena stimulator used: Yes                        | 32 (60)                    | 2 (50)                   | *                    | *                |
| Electrolyte disturbance: No†                     | 124 (78)                   | 4 (21)                   | reference            |                  |
| Electrolyte disturbance: Yes†                    | 15 (9)                     | 11 (58)                  | 29.94 (6.31,142.05)  | <b>&lt;0.001</b> |
| Electrolyte disturbance: NA†                     | 21 (13)                    | 4 (21)                   | 5.82 (1.16,29.19)    | <b>0.032</b>     |
| High stoma output: No†                           | 106 (65)                   | 8 (40)                   | *                    | *                |
| High stoma output: Yes†                          | 4 (3)                      | 0 (0)                    | *                    | *                |
| High stoma output: NA†                           | 52 (32)                    | 12 (60)                  | *                    | *                |
| Stoma prolapse: No†                              | 105 (65)                   | 8 (40)                   | reference            |                  |
| Stoma prolapse: Yes†                             | 4 (3)                      | 1 (5)                    | 4.02 (0.32,50.68)    | 0.282            |
| Stoma prolapse: NA†                              | 53 (33)                    | 11 (55)                  | 2.51 (0.85,7.46)     | 0.097            |
| Peri-stoma skin breakdown: No†                   | 87 (54)                    | 8 (40)                   | reference            |                  |
| Peri-stoma skin breakdown: Yes†                  | 20 (12)                    | 2 (10)                   | 1.02 (0.18,5.88)     | 0.983            |
| Peri-stoma skin breakdown: NA†                   | 54 (34)                    | 10 (50)                  | 1.71 (0.54,5.43)     | 0.363            |
| Sepsis: No†                                      | 126 (78)                   | 6 (32)                   | reference            |                  |

|                                                 | Alive<br>(n=167),<br>n (%) | Dead<br>(n=21),<br>n (%) | Univariable analysis |         |
|-------------------------------------------------|----------------------------|--------------------------|----------------------|---------|
|                                                 |                            |                          | OR (95% CI)          | P value |
| Sepsis: Yes†                                    | 12 (8)                     | 10 (53)                  | 22.20 (5.05,97.68)   | <0.001  |
| Sepsis: NA†                                     | 23 (14)                    | 3 (16)                   | 2.06 (0.37,11.59)    | 0.411   |
| Anal stenosis: No†                              | 77 (48)                    | 5 (26)                   | ref                  |         |
| Anal stenosis: Yes†                             | 6 (4)                      | 1 (5)                    | 1.85 (0.14,25.12)    | 0.643   |
| Anal stenosis: NA†                              | 77 (48)                    | 13 (68)                  | 2.61 (0.76,9.00)     | 0.128   |
| <b>Hospital level variables</b>                 |                            |                          |                      |         |
| Paediatric surgeons/million children, mean (SD) | 2.13 (0.84)                | 2.00 (0.92)              | 1.03 (0.45,2.32)     | 0.953   |
| Personnel: low                                  | 28 (18)                    | 0 (0)                    | *                    | *       |
| Personnel: medium                               | 105 (69)                   | 14 (74)                  | *                    | *       |
| Personnel: high                                 | 20 (13)                    | 5 (26)                   | *                    | *       |
| Infrastructure: low                             | 27 (17)                    | 1 (5)                    | *                    | *       |
| Infrastructure: medium                          | 94 (58)                    | 19 (95)                  | *                    | *       |
| Infrastructure: high                            | 41 (25)                    | 0 (0)                    | *                    | *       |
| Procedure: low                                  | 39 (24)                    | 9 (45)                   | reference            |         |
| Procedure: medium                               | 104 (64)                   | 8 (40)                   | 0.29 (0.07,1.21)     | 0.089   |
| Procedure: high                                 | 19 (12)                    | 3 (15)                   | 0.58 (0.09,3.84)     | 0.574   |
| Anaesthesia and Resuscitation: low              | 23 (14)                    | 3 (15)                   | reference            |         |
| Anaesthesia and Resuscitation: medium           | 97 (60)                    | 11 (55)                  | 0.68 (0.10,4.65)     | 0.691   |
| Anaesthesia and Resuscitation: high             | 42 (26)                    | 6 (30)                   | 0.83 (0.10,6.56)     | 0.857   |

\* Univariable analysis not possible due to low/zero counts or singularity of random intercept. † Within 30-days of surgery.  
 ASA: American Association of Anesthesiologists. CI: Confidence interval. IQR: Interquartile range. NA: Not applicable. OR: Odds ratio. SD: Standard deviation. WHO: World Health Organisation.

**Appendix Table 8. Univariable analysis of patient-level and hospital-level factors associated with mortality for patient with intussusception (generic and condition specific variables)**

|                                                                      | Alive<br>n=203,<br>(n (%)) | Dead<br>(n=21),<br>N (%) | Univariable analysis |         |
|----------------------------------------------------------------------|----------------------------|--------------------------|----------------------|---------|
|                                                                      |                            |                          | OR (95% CI)          | P value |
| Patient level variables: generic                                     |                            |                          |                      |         |
| Gestational age at birth, mean (SD)                                  | 39 (1)                     | 38 (1)                   | 0.74 (0.52,1.06)     | 0.103   |
| Age at presentation in months, median (IQR)                          | 7 [5, 10]                  | 6 [5, 9]                 | 0.98 (0.93,1.03)     | 0.418   |
| Male sex                                                             | 134 (66.0)                 | 13 (61.9)                | 0.84 (0.32,2.20)     | 0.723   |
| Weight in kg, median (IQR)                                           | 7.4 [6.4, 8.7]             | 8.0 [6.5, 8.0]           | 0.96 (0.83,1.11)     | 0.568   |
| Onset to presentation in days, median (IQR)                          | 3 [2, 5]                   | 5 [4, 7]                 | 1.00 (0.95,1.06)     | 0.897   |
| Distance from home in km, median (IQR)                               | 20 [10, 45]                | 23 [11, 50]              | *                    | *       |
| Mode of Transport: patient's own vs ambulance/health service vehicle | 184 (91.5)                 | 18 (85.7)                | 0.55 (0.14,2.24)     | 0.409   |
| ASA score: 1-3                                                       | 187 (94.9)                 | 10 (47.6)                | *                    | *       |
| ASA score: 4-5                                                       | 10 (5.1)                   | 11 (52.4)                | *                    | *       |
| WHO Checklist used: No                                               | 111 (54.7)                 | 13 (61.9)                | reference            |         |
| WHO Checklist used: Yes                                              | 82 (40.4)                  | 5 (23.8)                 | 0.45 (0.13,1.55)     | 0.205   |
| WHO Checklist used: NA, no intervention                              | 10 (4.9)                   | 3 (14.3)                 | 3.03 (0.62,14.82)    | 0.170   |
| Anaesthetic: General anaesthetic                                     | 155 (76.7)                 | 16 (76.2)                | reference            |         |
| Anaesthetic: No general anaesthetic                                  | 38 (18.8)                  | 1 (4.8)                  | 0.27 (0.03,2.22)     | 0.223   |
| Anaesthetic: NA, no intervention                                     | 9 (4.5)                    | 4 (19.0)                 | 5.67 (1.23,26.21)    | 0.026   |
| Anaesthetist: Doctor                                                 | 121 (59.6)                 | 13 (61.9)                | reference            |         |
| Anaesthetist: Non-doctor                                             | 50 (24.6)                  | 4 (19.0)                 | 0.69 (0.18,2.60)     | 0.587   |
| Anaesthetist: NA, no anaesthetic                                     | 32 (15.8)                  | 4 (19.0)                 | 1.50 (0.38,5.98)     | 0.563   |
| Blood transfusion: Yes                                               | 72 (35.6)                  | 16 (80.0)                | 7.97 (2.33,27.24)    | 0.001   |
| Surgical site infection: Yes                                         | 43 (21.3)                  | 2 (9.5)                  | 0.37 (0.08,1.75)     | 0.211   |
| Wound dehiscence: Yes                                                | 13 (6.4)                   | 0 (0.0)                  | *                    | *       |
| Further intervention: Yes                                            | 24 (11.8)                  | 2 (9.5)                  | *                    | *       |
| Patient level variables: condition specific                          |                            |                          |                      |         |
| Diagnosis: clinical                                                  | 35 (17.2)                  | 5 (23.8)                 | reference            |         |
| Diagnosis: US                                                        | 162 (79.8)                 | 12 (57.1)                | 0.54 (0.17,1.76)     | 0.306   |
| Diagnosis: other                                                     | 6 (3.0)                    | 4 (19.0)                 | 5.16 (0.88,30.40)    | 0.070   |
| Septic on arrival: Yes                                               | 82 (40.4)                  | 19 (90.5)                | 14.59 (3.10,68.70)   | 0.001   |
| Antibiotics given within 1hour of arrival: Yes                       | 118 (58.1)                 | 14 (66.7)                | 1.48 (0.53,4.15)     | 0.455   |
| If hypovolaemic or septic: IVF given pre-intervention: No            | 20 (9.9)                   | 0 (0.0)                  | *                    | *       |
| If hypovolaemic or septic: IVF given pre-intervention: Yes           | 135 (66.8)                 | 20 (95.2)                | *                    | *       |
| If hypovolaemic or septic: IVF given pre-intervention: N/A           | 47 (23.3)                  | 1 (4.8)                  | *                    | *       |
| Peritonitis: Yes†                                                    | 34 (16.7)                  | 7 (33.3)                 | 2.80 (0.93,8.40)     | 0.067   |
| Perforation: Yes†                                                    | 9 (4.4)                    | 6 (28.6)                 | *                    | *       |
| Shock: Yes†                                                          | 7 (3.4)                    | 5 (23.8)                 | 8.98 (2.21,36.50)    | 0.002   |
| Other contraindication: Yes†                                         | 54 (26.6)                  | 4 (19.0)                 | 0.61 (0.18,2.01)     | 0.414   |
| No contraindication†                                                 | 104 (51.2)                 | 3 (14.3)                 | *                    | *       |
| Intervention: laparotomy vs air or hydroenema reduction              | 140 (70.7)                 | 17 (100.0)               | *                    | *       |
| Successful air or hydroenema reduction: Yes                          | 40 (69.0)                  | 0 (0.0)                  | *                    | *       |
| Management at laparotomy: manual reduction                           | 63 (39.6)                  | 0 (0.0)                  | *                    | *       |
| Management at laparotomy: resection, primary anastomosis             | 93 (58.5)                  | 14 (82.4)                | *                    | *       |
| Management at laparotomy: resection, stoma                           | 3 (1.9)                    | 3 (17.6)                 | *                    | *       |
| Time from onset to reduction/management in hours, median IQR         | 15 [6,24]                  | 20 [9, 24]               | 1.00 (0.99,1.01)     | 0.848   |
| Recurrence: Yes                                                      | 3 (1.5)                    | 1 (5.0)                  | *                    | *       |

|                                                 | Alive<br>n=203,<br>(n (%)) | Dead<br>(n=21),<br>N (%) | Univariable analysis |         |
|-------------------------------------------------|----------------------------|--------------------------|----------------------|---------|
|                                                 |                            |                          | OR (95% CI)          | P value |
| Hospital level variables†                       |                            |                          |                      |         |
| Paediatric surgeons/million children, mean (SD) | 2.24 (0.84)                | 2.05 (0.94)              | 0.79 (0.42,1.50)     | 0.474   |
| Personnel: low                                  | 28 (15.7)                  | 1 (5.0)                  | reference            |         |
| Personnel: medium                               | 130 (73.0)                 | 16 (80.0)                | 3.84 (0.37,39.36)    | 0.257   |
| Personnel: high                                 | 20 (11.2)                  | 3 (15.0)                 | 4.72 (0.34,66.28)    | 0.250   |
| Infrastructure: low                             | 28 (14.0)                  | 1 (4.8)                  | reference            |         |
| Infrastructure: medium                          | 135 (67.5)                 | 17 (81.0)                | 4.23 (0.41,44.13)    | 0.227   |
| Infrastructure: high                            | 37 (18.5)                  | 3 (14.3)                 | 2.62 (0.19,35.51)    | 0.469   |
| Procedure: low                                  | 34 (17.0)                  | 6 (28.6)                 | reference            |         |
| Procedure: medium                               | 157 (78.5)                 | 14 (66.7)                | 0.51 (0.16,1.56)     | 0.237   |
| Procedure: high                                 | 9 (4.5)                    | 1 (4.8)                  | 0.60 (0.06,6.35)     | 0.674   |
| Anaesthetic and resuscitation: low              | 27 (13.5)                  | 3 (14.3)                 | reference            |         |
| Anaesthetic and resuscitation: medium           | 112 (56.0)                 | 11 (52.4)                | 0.91 (0.18,4.53)     | 0.904   |
| Anaesthetic and resuscitation: high             | 61 (30.5)                  | 7 (33.3)                 | 1.02 (0.18,5.62)     | 0.984   |

\* Univariable analysis not possible due to low/zero counts or singularity of random intercept. † As a contra-indication for air- or hydro-enema reduction. ASA: American Association of Anesthesiologists. CI: Confidence interval. IQR: Interquartile range. IVF: Intravenous fluid. NA: Not applicable. OR: Odds ratio. SD: Standard deviation. WHO: World Health Organisation. US: Ultrasound. Percentages have been rounded and may not total 100.

**Appendix Table 9. Patient data validation: agreement between the study dataset and validation dataset**

| Variable                                                                             | Observed agreement<br>% (patients with<br>agreement/ total patients)* | Kappa<br>statistic†     |
|--------------------------------------------------------------------------------------|-----------------------------------------------------------------------|-------------------------|
| <b>Generic variables:</b>                                                            |                                                                       |                         |
| Sex                                                                                  | 90% (45/50)                                                           | 0.80                    |
| Did the patient survive to discharge                                                 | 98% (49/50)                                                           | 0.85                    |
| Did the patient require a further intervention                                       | 96% (43/45)                                                           | -                       |
| Study condition                                                                      | 100% (50/50)                                                          | 1.00                    |
| <b>Condition specific variables:</b>                                                 |                                                                       |                         |
| Gestational age at birth (in patients with gastroschisis and anorectal malformation) | 83% (5/6)                                                             | 0.85                    |
| Type of gastroschisis - simple                                                       | 100% (5/5)                                                            | 1.00                    |
| Type of gastroschisis - associated with atresia                                      | 80% (4/5)                                                             | -                       |
| Type of gastroschisis - associated with necrosis                                     | 80% (4/5)                                                             | 0.55                    |
| Type of gastroschisis - associated with perforation                                  | 100% (5/5)                                                            | 1.00                    |
| Method of gastroschisis closure‡                                                     | 60% (3/5)                                                             | 0.44                    |
| Type of anorectal malformation                                                       | 50% (1/2)                                                             | -                       |
| Anorectal malformation primary operation                                             | 100% (2/2)                                                            | 1.0                     |
| Age at presentation in patients with appendicitis                                    | 94% (17/18)                                                           | 0.98                    |
| Management of appendicitis§                                                          | 94% (17/18)                                                           | 0.79                    |
| Operative findings in those with appendicitis                                        | 100% (18/18)                                                          | 1.00                    |
| Age at presentation in patients with intussusception                                 | 60% (3/5)                                                             | 0.41                    |
| Was the intussusception diagnosed on ultrasound                                      | 100% (5/5)                                                            | 1.00                    |
| Primary management in those with intussusception**                                   | 60% (3/5)                                                             | -                       |
| Age at diagnosis (in weeks) in patients with an inguinal hernia                      | 90% (18/20)                                                           | 0.94                    |
| Operation type (emergency or elective) in patients with an inguinal hernia           | 95% (19/20)                                                           | -                       |
| Operation undertaken in patients with an inguinal hernia                             | 100% (20/20)                                                          | 1.00                    |
| <b>Total</b>                                                                         | <b>94% (336/359)</b>                                                  | <b>Median:<br/>0.96</b> |

\* Data from 50 patients in 3 hospitals; 2 hospitals randomly selected for validation could not participate due to unavailability of the required data retrospectively. † 0.60-0.80 is good agreement; 0.81-1 is very good agreement. For some variables the kappa statistic could not be calculated due to all data confined to one category. ‡ Two differences were between preformed and surgical silo. § Difference was 'other' category. \*\* Main dataset had air enema reduction as primary intervention for two patients and the validation dataset had laparotomy – one explanation might be the validation data was collected from the operating room logbook retrospectively and hence the prior air enema reductions undertaken outside the OR were missed.

**Appendix Table 10. Validation survey undertaken by local investigators at validating centers**

| <b>Survey Question</b>                                                                                                                                                                                    | <b>No. of local investigators who collected study data (n=8), n (%)</b> | <b>No. of local investigators who collected validation data (n=4), n (%)</b> |
|-----------------------------------------------------------------------------------------------------------------------------------------------------------------------------------------------------------|-------------------------------------------------------------------------|------------------------------------------------------------------------------|
| <b>Do you think your team managed to identify all eligible patients for the study?</b>                                                                                                                    |                                                                         |                                                                              |
| Yes                                                                                                                                                                                                       | 8 (100)                                                                 | 3 (75)                                                                       |
| No                                                                                                                                                                                                        | 0 (0)                                                                   | 0 (0)                                                                        |
| Unsure                                                                                                                                                                                                    | 0 (0)                                                                   | 1 (25)                                                                       |
| <b>Could any of the patients have been missed from study inclusion?</b>                                                                                                                                   |                                                                         |                                                                              |
| Yes                                                                                                                                                                                                       | 3 (38)                                                                  | 1 (25)                                                                       |
| No                                                                                                                                                                                                        | 4 (50)                                                                  | 3 (75)                                                                       |
| Unsure                                                                                                                                                                                                    | 1 (13)                                                                  | 0 (0)                                                                        |
| <b>If yes or unsure, how might patients have been missed from study inclusion?*</b>                                                                                                                       |                                                                         |                                                                              |
| Patients who are discharged against medical advice or died before paediatric surgery team review.                                                                                                         | 2                                                                       | 1                                                                            |
| The resident collecting data may have missed a patient, especially if the data was collected after the patient's intervention.                                                                            | 1                                                                       | 0                                                                            |
| On nights and weekends the adult surgeons may also manage pediatric patients. Although general surgery daily service lists were checked, there is a possibility that one or two patients could be missed. | 1                                                                       | 0                                                                            |
| Poor record keeping.                                                                                                                                                                                      | 0                                                                       | 1                                                                            |
| <b>Are there any conditions that were more likely to be missed from study inclusion?</b>                                                                                                                  |                                                                         |                                                                              |
| Gastroschisis                                                                                                                                                                                             | 1 (13)                                                                  | 1 (25)                                                                       |
| Anorectal malformation                                                                                                                                                                                    | 0 (0)                                                                   | 0 (0)                                                                        |
| Appendicitis                                                                                                                                                                                              | 2 (25)                                                                  | 2 (50)                                                                       |
| Intussusception                                                                                                                                                                                           | 0 (0)                                                                   | 0 (0)                                                                        |
| Inguinal hernia                                                                                                                                                                                           | 5 (63)                                                                  | 1 (25)                                                                       |
| <b>If any of the conditions were more likely to be missed, why was this the case?*</b>                                                                                                                    |                                                                         |                                                                              |
| Inguinal hernia – may be seen in out-patients only, often managed as day cases, there are lots of patients with this condition.                                                                           | 3                                                                       | 1                                                                            |
| Appendicitis – some of the older children may have been managed by adult general surgeons.                                                                                                                | 2                                                                       | 1                                                                            |
| Gastroschisis – more likely to discharge against medical advice than other cases.                                                                                                                         | 1                                                                       | 0                                                                            |
| <b>Which patients with appendicitis did you include in the study?</b>                                                                                                                                     |                                                                         |                                                                              |
| Just patients within the paediatric services.                                                                                                                                                             | 4 (50)                                                                  | 4 (75)                                                                       |
| All eligible patients from adult and paediatric services.                                                                                                                                                 | 4 (50)                                                                  | 1 (25)                                                                       |
| <b>How did you identify patients to include in the study?</b>                                                                                                                                             |                                                                         |                                                                              |
| Ward round                                                                                                                                                                                                | 6 (75)                                                                  | 0 (0)                                                                        |
| Handover                                                                                                                                                                                                  | 5 (63)                                                                  | 0 (0)                                                                        |
| Operating room logbook                                                                                                                                                                                    | 4 (50)                                                                  | 3 (75)                                                                       |
| Planned operation lists                                                                                                                                                                                   | 4 (50)                                                                  | 1 (25)                                                                       |
| Ward patient lists                                                                                                                                                                                        | 8 (100)                                                                 | 4 (100)                                                                      |

|                                                                                                                                                                                                                                                                                                                               |          |        |
|-------------------------------------------------------------------------------------------------------------------------------------------------------------------------------------------------------------------------------------------------------------------------------------------------------------------------------|----------|--------|
| Word of mouth                                                                                                                                                                                                                                                                                                                 | 2 (25)   | 0 (0)  |
| Personal knowledge of patients                                                                                                                                                                                                                                                                                                | 5 (63)   | 0 (0)  |
| Other                                                                                                                                                                                                                                                                                                                         | 1 (13)   | 1 (25) |
| <b>If none of the collaborators were present at the hospital for one or more days during the study, was the team able to identify patients eligible for the study on those days?</b>                                                                                                                                          |          |        |
| Yes                                                                                                                                                                                                                                                                                                                           | 6 (75)   | 3 (75) |
| No                                                                                                                                                                                                                                                                                                                            | 0 (0)    | 0 (0)  |
| Not applicable                                                                                                                                                                                                                                                                                                                | 2 (25)   | 0 (0)  |
| Unsure                                                                                                                                                                                                                                                                                                                        | 0 (0)    | 1 (25) |
| <b>How did you identify patients to be included in the study on days when study collaborators were not present at the hospital?*</b>                                                                                                                                                                                          |          |        |
| Handover                                                                                                                                                                                                                                                                                                                      | 2        | 0      |
| Operating room logbook                                                                                                                                                                                                                                                                                                        | 1        | 2      |
| Ward patient lists                                                                                                                                                                                                                                                                                                            | 2        | 0      |
| Word of mouth                                                                                                                                                                                                                                                                                                                 | 3        | 0      |
| Personal knowledge of patients                                                                                                                                                                                                                                                                                                | 1        | 0      |
| Not applicable – there is never a time when a member of the pediatric surgery team is not on the ground.                                                                                                                                                                                                                      | 3        | 0      |
| Emergency records                                                                                                                                                                                                                                                                                                             | 1        | 0      |
| Case logs/ ward book/ electronic medical record system for billing                                                                                                                                                                                                                                                            | 1        | 3      |
| <b>Do you have any concerns regarding the accuracy of the data collected?</b>                                                                                                                                                                                                                                                 |          |        |
| Yes                                                                                                                                                                                                                                                                                                                           | 2 (25)   | 1 (25) |
| No                                                                                                                                                                                                                                                                                                                            | 5 (62.5) | 3 (75) |
| Unsure                                                                                                                                                                                                                                                                                                                        | 1 (12.5) | 0 (0)  |
| <b>What data points might be inaccurate and what were the challenges for collecting the data?*</b>                                                                                                                                                                                                                            |          |        |
| Collecting exact distances from home to hospital.                                                                                                                                                                                                                                                                             | 2        | 0      |
| Accuracy of gestational age stated by illiterate mothers.                                                                                                                                                                                                                                                                     | 2        | 0      |
| Exact duration of time between presentation and primary intervention – these may not be documented.                                                                                                                                                                                                                           | 2        | 0      |
| Poor record keeping.                                                                                                                                                                                                                                                                                                          | 0        | 1      |
| <b>Were any of the data points more difficult to collect accurately? If so, which ones and why?*</b>                                                                                                                                                                                                                          |          |        |
| Following up patients managed by the general adult surgeons to 30-days following intervention.                                                                                                                                                                                                                                | 1        | 0      |
| Distance from home to hospital. Most cities are not planned and distances are not accurately stated. We used Google distance calculator in some cases and estimated some. Some patients come from 'these parts' and do not have an accurate name for calculating. People measure distance of travel by cost of the transport. | 3        | 0      |
| Gestational age – illiterate mothers often estimate pregnancy in months rather than weeks. Many do not have an ultrasound for dating. Records say 'full term baby' which is anything from 37 to 40 weeks.                                                                                                                     | 2        | 2      |
| Time from admission to intervention. Paediatricians may review patients first and not document the time of admission. Some cases had no timing documented on the anesthetic chart.                                                                                                                                            | 2        | 0      |

\* Free text boxes: percentages not calculated. Percentages have been rounded and may not total 100.

Appendix Table 11. Validation of the hospital data (n=40)

| Variable                                                                     | Observed agreement*,<br>% (no. hospitals with<br>agreement/ total no.<br>validation hospitals) | ICC† |
|------------------------------------------------------------------------------|------------------------------------------------------------------------------------------------|------|
| <b>Personnel</b>                                                             |                                                                                                |      |
| Population served by the hospital in millions                                | 23% (5/22)                                                                                     | 1.00 |
| No. Paediatric Surgeons undertaking general paediatric surgery per hospital  | 74% (28/38)                                                                                    | 0.87 |
| No. Paediatric Surgeons undertaking neonatal surgery per hospital            | 63% (24/38)                                                                                    | 0.86 |
| No. General Surgeons undertaking general paediatric surgery per hospital     | 58% (22/38)                                                                                    | 0.80 |
| No. General Surgeons undertaking neonatal surgery per hospital               | 68% (26/38)                                                                                    | 0.71 |
| No. Medical Officers undertaking paediatric surgery per hospital             | 68% (25/37)                                                                                    | 0.48 |
| No. Medical Officers undertaking neonatal surgery per hospital               | 81% (30/37)                                                                                    | 0.06 |
| <b>Infrastructure and surgical resources</b>                                 |                                                                                                |      |
| Running water                                                                | 71% (27/38)                                                                                    | 0.55 |
| Electricity                                                                  | 63% (24/38)                                                                                    | 0.50 |
| Electricity generator back-up                                                | 74% (28/38)                                                                                    | 0.44 |
| Laboratory for biochemistry                                                  | 76% (29/38)                                                                                    | 0.53 |
| Laboratory for hematology                                                    | 71% (27/38)                                                                                    | 0.32 |
| Blood bank                                                                   | 62% (25/40)                                                                                    | 0.12 |
| Functioning ultrasound (US) machine                                          | 72% (29/40)                                                                                    | 0.38 |
| Fluoroscopy                                                                  | 78% (31/40)                                                                                    | 0.58 |
| Paediatric ventilation outside of the operating room (OR)                    | 85% (34/40)                                                                                    | 0.88 |
| Neonatal ventilation outside of the OR                                       | 90% (36/40)                                                                                    | 0.93 |
| Availability of a Paediatric Intensive Care Unit (ICU) for surgical patients | 87% (33/38)                                                                                    | 0.67 |
| Availability of Neonatal ICU for surgical patients                           | 84% (32/38)                                                                                    | 0.67 |
| Parenteral nutrition                                                         | 90% (36/40)                                                                                    | 0.81 |
| Surgical Safety Checklist in the OR                                          | 62% (25/40)                                                                                    | 0.60 |
| Sterile gloves and gown                                                      | 84% (32/38)                                                                                    | -    |
| Autoclave for sterilising surgical equipment                                 | 87% (33/38)                                                                                    | -    |
| Pena stimulator for identifying the muscle complex in ARM surgery            | 74% (28/38)                                                                                    | 0.67 |
| <b>Procedures</b>                                                            |                                                                                                |      |
| Cotside reduction and primary closure of gastroschisis (Bianchi technique)   | 95% (37/39)                                                                                    | 0.72 |
| Preformed silo application, reduction and closure of gastroschisis           | 79% (31/39)                                                                                    | 0.6  |
| Surgical silo application, reduction and closure of gastroschisis            | 59% (23/39)                                                                                    | 0.35 |
| Primary closure of gastroschisis in the OR                                   | 64% (25/39)                                                                                    | 0.48 |
| Sigmoid colostomy for anorectal malformation                                 | 75% (30/40)                                                                                    | 0.38 |
| Posterior sagittal anorectoplasty (PSARP) for anorectal malformation         | 78% (31/40)                                                                                    | 0.49 |
| Open appendectomy                                                            | 85% (34/40)                                                                                    | -    |
| Laparoscopic appendectomy                                                    | 80% (32/40)                                                                                    | 0.56 |
| US drainage of intra-abdominal collection                                    | 70% (26/37)                                                                                    | 0.57 |
| CT drainage of intra-abdominal collection                                    | 84% (32/38)                                                                                    | 0.34 |
| US diagnosis of intussusception                                              | 78% (31/40)                                                                                    | 0.54 |
| Air-enema reduction of intussusception                                       | 92% (36/39)                                                                                    | 0.93 |
| Hydro-enema reduction of intussusception                                     | 87% (34/39)                                                                                    | 0.68 |
| Laparotomy for intussusception                                               | 62% (25/40)                                                                                    | -    |
| Open inguinal herniotomy                                                     | 98% (39/40)                                                                                    | 0.61 |
| Laparoscopic inguinal herniotomy                                             | 90% (35/39)                                                                                    | 0.67 |
| Paediatric central line insertion                                            | 75% (30/40)                                                                                    | 0.56 |
| Neonatal central line insertion                                              | 82% (33/40)                                                                                    | 0.70 |
| Umbilical catheterisation                                                    | 72% (28/39)                                                                                    | 0.69 |
| <b>Anaesthesia and resuscitation</b>                                         |                                                                                                |      |
| Paediatric bag, valve and mask                                               | 70% (28/40)                                                                                    | 0.14 |
| Bottled oxygen                                                               | 75% (30/40)                                                                                    | 0.40 |
| Piped oxygen                                                                 | 82% (33/40)                                                                                    | 0.60 |
| Oxygen saturation monitor                                                    | 72% (29/40)                                                                                    | 0.27 |
| Apnoea monitor                                                               | 71% (27/38)                                                                                    | 0.61 |
| Multi-parameter intra-operative monitoring                                   | 66% (25/38)                                                                                    | 0.02 |

| Variable                                                                           | Observed agreement*, % (no. hospitals with agreement/ total no. validation hospitals) | ICC†                        |
|------------------------------------------------------------------------------------|---------------------------------------------------------------------------------------|-----------------------------|
| Anaesthetic machine for children                                                   | 60% (24/40)                                                                           | 0.15                        |
| Anaesthetic machine for neonates                                                   | 68% (27/40)                                                                           | 0.46                        |
| Ketamine anaesthesia for children                                                  | 65% (26/40)                                                                           | 0.22                        |
| Ketamine anaesthesia for neonates                                                  | 68% (26/38)                                                                           | 0.22                        |
| Spinal/ caudal anaesthesia for children                                            | 80% (32/40)                                                                           | 0.54                        |
| Spinal/ caudal anaesthesia for neonates                                            | 84% (32/38)                                                                           | 0.58                        |
| Anaesthetic doctor competent to perform paediatric anaesthesia                     | 85% (34/40)                                                                           | 0.75                        |
| Anaesthetic doctor competent to perform neonatal anaesthesia                       | 82% (33/40)                                                                           | 0.71                        |
| Anaesthetic nurse competent to perform paediatric anaesthesia                      | 68% (27/40)                                                                           | 0.61                        |
| Anaesthetic nurse competent to perform neonatal anaesthesia                        | 75% (30/40)                                                                           | 0.61                        |
| Presence of a children's hospital within the country of the participating hospital | 70% (28/40)                                                                           | 0.58                        |
| Total                                                                              | 75% (1752/2327)                                                                       | Median 0.58, IQR 0.41, 0.69 |

\* Observed agreement (always vs sometimes/never) between the two most senior team members who completed the survey at each hospital. Only hospitals with more than one rater were included (n=40).

† Interclass Correlation Coefficients (ICCs) were calculated from mixed models with hospital as the random intercept. ICC interpretation: <0.40 poor, 0.40-0.59 fair, 0.60-0.74 good, 0.75-1.00 excellent. Results represent the level of agreement between all respondents from each hospital where more than one respondent completed the survey. For some variables the ICC could not be calculated due to all data confined to one category.
